# Supplementary material for: Gate-controlled photo-oxidation of graphene for electronic structure modification
Source: Royal Society of Chemistry journal article supplement (doi:10.1039/c8tc05639k), 2019-01-01
Supplement: c8tc05639k1.pdf [file c8tc05639k1.pdf]

## Electronic Supplementary Information for

# Gate-controlled photo-oxidation of graphene for electronic structure modification

Ryo Nouchi,<sup>a,b</sup> Morihiro Matsumoto<sup>a</sup> and Nobuhiko Mitoma<sup>a</sup>

<sup>a</sup> Department of Physics and Electronics, and Nanoscience and Nanotechnology Research Center, Osaka Prefecture University, Sakai 599-8570, Japan

<sup>b</sup> PRESTO, Japan Science and Technology Agency, Kawaguchi 332-0012, Japan

### Contents:

- Supporting figure S1: Spectrum of the ultraviolet light source used in this study

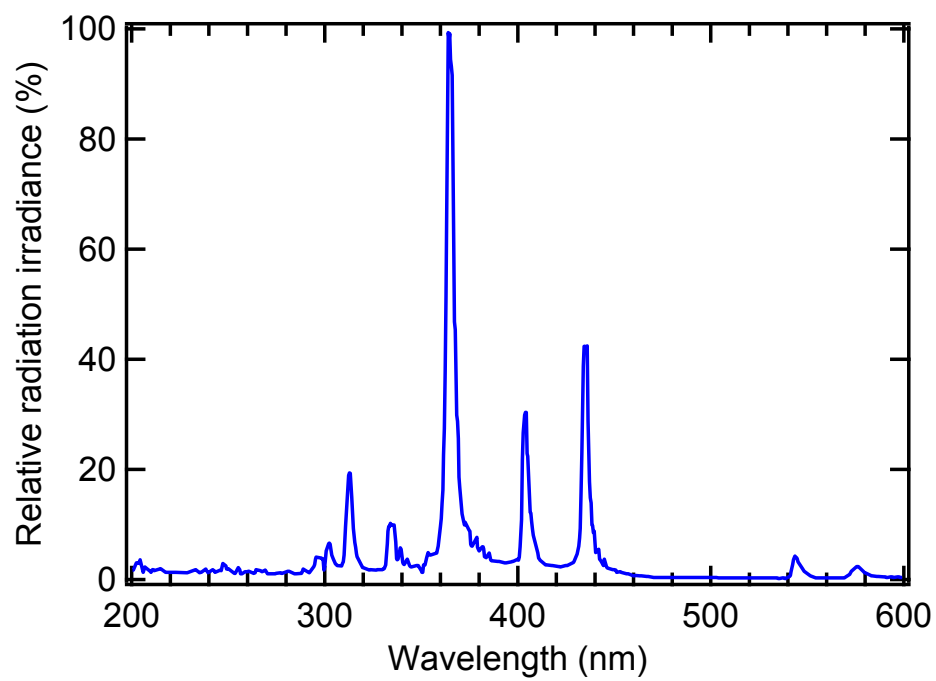

**Fig. S1** Spectrum of the ultraviolet light source used in this study.
