# Supplementary material for: Gate-controlled photo-oxidation of graphene for electronic structure modification
Source: Royal Society of Chemistry journal article supplement (doi:10.1039/c8tc05639k), 2019-01-01
Supplement: c8tc05639k2.xlsx [file c8tc05639k2.xlsx]

## Sheet: Fig. 2c
Wavenumber (cm-1)	Oxidized	Non-oxidized
476.04	192	0
478.189	187	5
480.338	340	89
482.487	355	100
484.635	357	120
486.782	357	98
488.929	379	117
491.076	385	132
493.221	386	135
495.367	382	141
497.511	434	180
499.656	449	203
501.799	487	243
503.943	558	265
506.085	657	377
508.228	748	483
510.369	961	665
512.51	1453	1188
514.651	2633	2379
516.791	5455	5097
518.93	9538	8670
521.07	9659	8541
523.208	4874	3905
525.346	2205	1635
527.483	1291	980
529.62	938	652
531.757	780	480
533.893	672	407
536.028	574	326
538.163	512	244
540.297	484	232
542.431	487	214
544.564	464	195
546.697	417	169
548.829	414	180
550.961	404	142
553.092	406	131
555.223	374	143
557.353	376	142
559.482	399	142
561.611	392	121
563.74	360	115
565.868	340	103
567.996	371	92
570.123	342	132
572.249	366	117
574.375	343	97
576.5	337	104
578.625	343	81
580.75	344	83
582.874	313	84
584.997	313	105
587.12	369	83
589.242	333	81
591.364	325	97
593.485	351	84
595.606	340	70
597.726	321	105
599.846	334	84
601.965	326	102
604.084	328	84
606.202	329	84
608.32	362	72
610.437	339	91
612.554	320	115
614.67	367	109
616.785	345	92
618.9	365	108
621.015	338	118
623.129	363	114
625.243	327	122
627.356	352	82
629.468	317	90
631.58	365	92
633.692	312	92
635.803	312	103
637.913	320	85
640.023	334	94
642.132	346	108
644.241	331	78
646.35	323	84
648.458	363	111
650.565	334	96
652.672	328	77
654.778	344	71
656.884	332	69
658.989	361	84
661.094	376	64
663.198	319	66
665.302	340	97
667.405	334	94
669.508	322	72
671.61	329	67
673.712	331	77
675.813	334	83
677.914	308	87
680.014	325	89
682.114	338	76
684.213	337	80
686.312	354	81
688.41	313	86
690.508	303	87
692.605	293	57
694.701	314	56
696.798	314	70
698.893	311	68
700.988	274	80
703.083	336	65
705.177	325	51
707.27	314	74
709.364	302	74
711.456	300	61
713.548	304	53
715.64	284	56
717.731	288	81
719.821	288	54
721.911	311	56
724.001	301	57
726.09	300	104
728.178	320	81
730.266	335	84
732.354	309	89
734.441	293	85
736.527	321	37
738.613	336	61
740.699	304	93
742.784	347	75
744.868	300	58
746.952	305	49
749.035	304	78
751.118	301	66
753.201	325	73
755.283	316	89
757.364	298	69
759.445	317	71
761.525	324	87
763.605	301	92
765.685	335	55
767.764	338	91
769.842	318	71
771.92	309	73
773.997	297	76
776.074	331	67
778.15	321	79
780.226	340	75
782.302	343	58
784.377	287	71
786.451	318	63
788.525	324	73
790.598	321	84
792.671	312	67
794.743	311	76
796.815	330	66
798.887	304	71
800.957	304	69
803.028	299	90
805.098	320	76
807.167	328	74
809.236	327	78
811.304	330	81
813.372	332	53
815.439	340	74
817.506	328	81
819.573	319	94
821.639	311	97
823.704	306	95
825.769	332	101
827.833	335	86
829.897	339	70
831.96	312	51
834.023	337	76
836.086	300	83
838.147	327	69
840.209	328	69
842.27	317	39
844.33	309	73
846.39	316	70
848.449	332	68
850.508	312	61
852.567	308	76
854.625	307	75
856.682	295	71
858.739	338	72
860.795	290	64
862.851	316	91
864.907	337	97
866.961	331	82
869.016	331	49
871.07	307	75
873.123	314	76
875.176	326	74
877.229	305	69
879.281	322	80
881.332	327	90
883.383	338	98
885.433	299	64
887.483	318	90
889.533	347	78
891.582	329	103
893.63	327	90
895.678	340	60
897.726	308	102
899.773	346	69
901.819	317	55
903.865	348	72
905.911	298	91
907.956	308	89
910.001	340	75
912.045	298	80
914.088	319	92
916.131	315	96
918.174	311	71
920.216	329	90
922.258	360	80
924.299	340	117
926.339	350	129
928.379	377	161
930.419	389	133
932.458	449	213
934.497	437	219
936.535	493	252
938.573	505	261
940.61	563	311
942.647	563	327
944.683	555	268
946.719	574	286
948.754	537	280
950.789	581	277
952.823	556	308
954.857	544	257
956.89	593	290
958.923	537	294
960.955	563	268
962.987	546	288
965.018	557	324
967.049	553	338
969.079	589	325
971.109	541	254
973.139	570	352
975.168	569	299
977.196	585	274
979.224	574	288
981.251	560	302
983.278	509	289
985.305	576	305
987.331	529	283
989.356	534	280
991.381	461	204
993.406	462	178
995.43	431	173
997.453	405	161
999.476	385	172
1001.5	378	137
1003.52	351	117
1005.54	359	126
1007.56	369	93
1009.58	356	115
1011.6	364	97
1013.62	371	89
1015.64	352	104
1017.66	348	99
1019.68	346	79
1021.7	326	89
1023.72	343	99
1025.73	340	102
1027.75	312	92
1029.76	301	95
1031.78	315	81
1033.79	318	87
1035.81	319	55
1037.82	316	52
1039.84	316	38
1041.85	299	60
1043.86	312	54
1045.87	292	39
1047.89	261	47
1049.9	311	59
1051.91	294	66
1053.92	344	70
1055.93	312	80
1057.94	321	50
1059.94	334	46
1061.95	317	54
1063.96	308	61
1065.97	325	70
1067.97	280	67
1069.98	331	50
1071.99	324	47
1073.99	313	61
1076	284	53
1078	303	53
1080	288	44
1082.01	293	61
1084.01	306	62
1086.01	307	33
1088.01	291	59
1090.02	315	60
1092.02	326	40
1094.02	311	51
1096.02	287	51
1098.02	310	34
1100.02	324	31
1102.01	294	55
1104.01	288	38
1106.01	300	43
1108.01	278	42
1110	298	53
1112	301	47
1114	284	47
1115.99	291	46
1117.99	319	43
1119.98	323	27
1121.97	309	60
1123.97	299	48
1125.96	289	49
1127.95	312	55
1129.94	312	47
1131.94	276	50
1133.93	298	41
1135.92	312	55
1137.91	305	40
1139.9	302	36
1141.89	301	38
1143.87	303	29
1145.86	309	35
1147.85	293	41
1149.84	302	46
1151.82	304	48
1153.81	298	47
1155.8	312	42
1157.78	279	45
1159.77	311	24
1161.75	327	40
1163.73	325	24
1165.72	312	40
1167.7	321	46
1169.68	301	47
1171.66	292	33
1173.65	325	37
1175.63	302	67
1177.61	288	20
1179.59	307	29
1181.57	291	46
1183.55	281	52
1185.53	288	42
1187.5	319	25
1189.48	281	48
1191.46	301	23
1193.44	309	23
1195.41	283	32
1197.39	297	22
1199.36	315	47
1201.34	341	43
1203.31	321	31
1205.29	296	58
1207.26	295	54
1209.23	329	35
1211.21	293	25
1213.18	316	11
1215.15	310	47
1217.12	321	29
1219.09	310	24
1221.06	328	26
1223.03	307	35
1225	291	27
1226.97	321	32
1228.94	301	19
1230.91	298	23
1232.87	321	34
1234.84	321	42
1236.81	327	27
1238.77	322	24
1240.74	316	45
1242.7	330	29
1244.67	322	14
1246.63	319	27
1248.6	333	34
1250.56	307	32
1252.52	321	28
1254.49	330	24
1256.45	342	45
1258.41	351	35
1260.37	346	18
1262.33	329	34
1264.29	330	35
1266.25	363	28
1268.21	336	32
1270.17	338	29
1272.13	339	43
1274.08	343	27
1276.04	358	25
1278	357	29
1279.95	370	39
1281.91	393	38
1283.86	379	35
1285.82	386	25
1287.77	354	48
1289.73	391	32
1291.68	377	23
1293.64	362	32
1295.59	382	17
1297.54	432	29
1299.49	415	32
1301.44	412	44
1303.39	360	41
1305.34	423	35
1307.29	425	35
1309.24	449	48
1311.19	461	29
1313.14	476	45
1315.09	444	31
1317.04	426	20
1318.98	449	35
1320.93	477	32
1322.88	450	25
1324.82	446	38
1326.77	461	28
1328.71	498	28
1330.66	481	36
1332.6	524	52
1334.54	476	29
1336.49	491	36
1338.43	489	34
1340.37	503	48
1342.31	500	38
1344.25	508	45
1346.19	523	37
1348.14	529	42
1350.07	537	53
1352.01	539	40
1353.95	542	41
1355.89	518	30
1357.83	504	36
1359.77	472	35
1361.7	493	26
1363.64	494	25
1365.58	483	32
1367.51	479	18
1369.45	487	56
1371.38	475	38
1373.32	476	41
1375.25	499	44
1377.18	475	44
1379.12	429	55
1381.05	431	51
1382.98	442	43
1384.91	424	41
1386.84	459	51
1388.77	434	33
1390.71	427	33
1392.63	396	29
1394.56	396	40
1396.49	424	39
1398.42	406	32
1400.35	378	24
1402.28	388	32
1404.2	392	36
1406.13	355	32
1408.06	385	40
1409.98	369	43
1411.91	379	29
1413.83	324	33
1415.76	353	32
1417.68	352	22
1419.6	337	35
1421.53	352	21
1423.45	347	31
1425.37	321	15
1427.29	338	51
1429.21	351	38
1431.14	350	40
1433.06	329	3
1434.98	319	25
1436.89	345	31
1438.81	314	22
1440.73	322	31
1442.65	312	43
1444.57	319	29
1446.49	342	36
1448.4	332	27
1450.32	284	44
1452.23	312	14
1454.15	302	18
1456.06	326	45
1457.98	324	20
1459.89	325	38
1461.81	321	30
1463.72	321	15
1465.63	296	46
1467.54	315	24
1469.46	320	29
1471.37	316	32
1473.28	342	45
1475.19	311	21
1477.1	327	15
1479.01	352	25
1480.92	325	44
1482.83	312	47
1484.73	299	22
1486.64	328	30
1488.55	330	28
1490.46	290	41
1492.36	339	42
1494.27	320	22
1496.17	321	37
1498.08	315	32
1499.98	357	49
1501.89	314	47
1503.79	326	35
1505.69	316	40
1507.6	328	18
1509.5	338	35
1511.4	337	40
1513.3	315	35
1515.2	332	28
1517.1	311	35
1519	304	11
1520.9	316	35
1522.8	312	29
1524.7	339	18
1526.6	300	36
1528.5	351	29
1530.4	321	40
1532.29	322	42
1534.19	344	30
1536.09	325	28
1537.98	338	20
1539.88	340	43
1541.77	365	33
1543.67	350	31
1545.56	340	37
1547.45	350	50
1549.35	366	40
1551.24	324	40
1553.13	357	37
1555.02	367	41
1556.92	360	48
1558.81	346	58
1560.7	360	35
1562.59	347	31
1564.48	365	42
1566.37	362	37
1568.25	357	30
1570.14	370	75
1572.03	396	74
1573.92	380	79
1575.8	388	103
1577.69	366	117
1579.58	376	133
1581.46	403	142
1583.35	411	165
1585.23	444	209
1587.12	404	254
1589	415	217
1590.88	421	202
1592.77	447	164
1594.65	430	132
1596.53	441	96
1598.41	428	96
1600.29	424	78
1602.18	450	79
1604.06	448	55
1605.94	446	35
1607.81	419	44
1609.69	430	47
1611.57	442	22
1613.45	464	37
1615.33	430	61
1617.21	406	52
1619.08	424	29
1620.96	426	32
1622.84	428	25
1624.71	425	33
1626.59	382	20
1628.46	383	42
1630.33	372	28
1632.21	385	25
1634.08	390	48
1635.95	340	30
1637.83	339	33
1639.7	325	40
1641.57	336	17
1643.44	316	6
1645.31	302	40
1647.18	286	30
1649.05	275	16
1650.92	287	30
1652.79	292	30
1654.66	279	26
1656.53	330	21
1658.4	282	32
1660.26	260	24
1662.13	293	12
1664	270	28
1665.86	272	20
1667.73	282	18
1669.59	293	37
1671.46	280	34
1673.32	293	32
1675.19	283	15
1677.05	255	26
1678.91	259	24
1680.78	257	10
1682.64	254	33
1684.5	264	29
1686.36	274	13
1688.22	290	10
1690.08	276	44
1691.94	267	25
1693.8	268	37
1695.66	285	19
1697.52	267	46
1699.38	255	15
1701.23	243	29
1703.09	279	46
1704.95	281	15
1706.81	274	4
1708.66	258	32
1710.52	266	18
1712.37	281	25
1714.23	265	21
1716.08	261	30
1717.94	282	28
1719.79	270	20
1721.64	285	31
1723.49	277	29
1725.35	270	15
1727.2	272	31
1729.05	279	28
1730.9	260	20
1732.75	279	29
1734.6	280	32
1736.45	263	12
1738.3	279	14
1740.15	259	50
1742	271	19
1743.85	269	8
1745.69	270	8
1747.54	267	31
1749.39	272	29
1751.23	270	32
1753.08	283	36
1754.92	280	17
1756.77	253	21
1758.61	277	29
1760.46	248	35
1762.3	274	36
1764.15	266	44
1765.99	260	26
1767.83	270	22
1769.67	248	37
1771.51	273	27
1773.36	270	29
1775.2	269	8
1777.04	242	4
1778.88	259	13
1780.72	261	21
1782.55	257	18
1784.39	253	30
1786.23	260	30
1788.07	268	49
1789.91	243	21
1791.74	244	29
1793.58	241	30
1795.42	253	29
1797.25	266	30
1799.09	271	25
1800.92	260	28
1802.76	280	25
1804.59	264	19
1806.42	266	41
1808.26	246	15
1810.09	258	26
1811.92	263	11
1813.75	249	22
1815.58	232	44
1817.42	237	17
1819.25	251	42
1821.08	251	28
1822.91	265	27
1824.74	267	25
1826.56	246	22
1828.39	278	7
1830.22	244	19
1832.05	285	31
1833.88	260	9
1835.7	278	28
1837.53	257	25
1839.35	253	25
1841.18	269	0
1843.01	275	33
1844.83	260	20
1846.65	267	28
1848.48	258	15
1850.3	280	35
1852.12	258	11
1853.95	279	20
1855.77	264	21
1857.59	244	34
1859.41	269	41
1861.23	267	16
1863.05	249	35
1864.87	262	41
1866.69	242	21
1868.51	258	57
1870.33	273	51
1872.15	278	11
1873.97	288	20
1875.79	249	33
1877.6	270	34
1879.42	278	24
1881.24	279	18
1883.05	254	23
1884.87	265	38
1886.68	270	29
1888.5	280	18
1890.31	266	29
1892.13	260	23
1893.94	256	32
1895.75	275	19
1897.56	259	35
1899.38	261	39
1901.19	268	39
1903	266	13
1904.81	268	29
1906.62	240	41
1908.43	250	22
1910.24	261	23
1912.05	238	24
1913.86	266	23
1915.67	272	23
1917.48	254	41
1919.28	276	25
1921.09	244	32
1922.9	255	17
1924.7	265	33
1926.51	274	19
1928.31	268	21
1930.12	234	24
1931.92	291	27
1933.73	248	30
1935.53	245	19
1937.34	226	16
1939.14	263	37
1940.94	257	35
1942.74	261	45
1944.55	244	23
1946.35	259	34
1948.15	251	37
1949.95	255	39
1951.75	263	24
1953.55	234	25
1955.35	261	25
1957.15	259	16
1958.95	248	17
1960.74	262	24
1962.54	265	9
1964.34	269	22
1966.14	252	28
1967.93	243	50
1969.73	264	23
1971.52	264	31
1973.32	248	28
1975.11	282	22
1976.91	228	43
1978.7	246	20
1980.5	246	13
1982.29	266	42
1984.08	253	45
1985.88	269	43
1987.67	251	19
1989.46	266	25
1991.25	244	49
1993.04	269	35
1994.83	252	26
1996.62	272	21
1998.41	262	26
2000.2	255	29
2001.99	250	32
2003.78	241	24
2005.56	248	40
2007.35	280	41
2009.14	259	30
2010.93	262	33
2012.71	255	37
2014.5	268	34
2016.28	248	14
2018.07	258	17
2019.85	278	47
2021.64	254	34
2023.42	260	16
2025.2	254	16
2026.99	244	14
2028.77	271	26
2030.55	263	27
2032.33	260	31
2034.12	268	22
2035.9	287	32
2037.68	271	5
2039.46	263	26
2041.24	264	18
2043.02	258	43
2044.8	262	45
2046.57	263	11
2048.35	268	29
2050.13	260	32
2051.91	250	15
2053.68	260	22
2055.46	258	36
2057.24	248	28
2059.01	270	11
2060.79	257	14
2062.56	233	23
2064.34	237	0
2066.11	255	33
2067.89	257	18
2069.66	241	1
2071.43	255	31
2073.2	255	31
2074.98	268	47
2076.75	277	20
2078.52	236	32
2080.29	263	22
2082.06	256	19
2083.83	255	22
2085.6	254	32
2087.37	248	20
2089.14	267	28
2090.91	253	15
2092.68	250	20
2094.44	254	18
2096.21	254	30
2097.98	250	20
2099.74	268	18
2101.51	269	40
2103.28	242	31
2105.04	257	21
2106.81	242	20
2108.57	248	38
2110.33	275	39
2112.1	254	14
2113.86	246	18
2115.62	225	19
2117.39	250	27
2119.15	273	26
2120.91	249	35
2122.67	244	34
2124.43	257	30
2126.19	278	17
2127.95	265	37
2129.71	272	16
2131.47	267	31
2133.23	244	18
2134.99	260	0
2136.75	243	26
2138.51	268	25
2140.26	245	52
2142.02	252	17
2143.78	264	20
2145.53	211	34
2147.29	280	47
2149.04	252	12
2150.8	240	16
2152.55	247	13
2154.31	238	22
2156.06	247	25
2157.81	237	21
2159.57	241	14
2161.32	259	19
2163.07	257	21
2164.82	262	15
2166.58	241	21
2168.33	252	38
2170.08	259	5
2171.83	246	22
2173.58	237	28
2175.33	248	26
2177.08	278	29
2178.82	262	36
2180.57	252	36
2182.32	263	24
2184.07	265	19
2185.81	252	24
2187.56	248	16
2189.31	243	32
2191.05	231	36
2192.8	258	16
2194.54	253	17
2196.29	253	32
2198.03	250	29
2199.78	246	14
2201.52	244	37
2203.26	255	37
2205.01	252	31
2206.75	251	16
2208.49	273	13
2210.23	267	12
2211.97	275	9
2213.71	246	26
2215.45	259	41
2217.19	242	14
2218.93	251	45
2220.67	251	30
2222.41	244	32
2224.15	246	30
2225.89	248	20
2227.63	255	21
2229.36	239	3
2231.1	268	26
2232.84	257	31
2234.57	272	15
2236.31	241	8
2238.04	259	25
2239.78	242	32
2241.51	239	24
2243.25	261	40
2244.98	251	24
2246.71	260	41
2248.45	264	39
2250.18	237	33
2251.91	234	41
2253.64	251	32
2255.37	229	37
2257.1	229	12
2258.83	250	5
2260.57	244	16
2262.29	234	29
2264.02	256	11
2265.75	252	34
2267.48	270	17
2269.21	270	26
2270.94	252	22
2272.67	264	20
2274.39	228	35
2276.12	268	19
2277.85	238	33
2279.57	249	33
2281.3	256	9
2283.02	254	44
2284.75	261	35
2286.47	260	26
2288.2	251	33
2289.92	254	23
2291.64	242	24
2293.36	252	23
2295.09	231	23
2296.81	240	30
2298.53	260	22
2300.25	241	40
2301.97	233	12
2303.69	257	35
2305.41	257	30
2307.13	246	28
2308.85	248	26
2310.57	256	23
2312.29	254	21
2314.01	239	31
2315.73	254	11
2317.44	246	12
2319.16	259	41
2320.88	257	25
2322.59	247	18
2324.31	237	34
2326.02	241	36
2327.74	275	27
2329.45	247	55
2331.17	235	44
2332.88	270	65
2334.6	282	28
2336.31	241	41
2338.02	232	37
2339.73	258	19
2341.45	247	37
2343.16	267	27
2344.87	259	21
2346.58	233	28
2348.29	249	27
2350	248	22
2351.71	258	34
2353.42	257	17
2355.13	275	21
2356.84	266	29
2358.55	241	11
2360.25	260	30
2361.96	256	17
2363.67	245	28
2365.37	248	23
2367.08	233	27
2368.79	259	17
2370.49	246	18
2372.2	254	26
2373.9	257	12
2375.61	261	34
2377.31	249	10
2379.01	249	21
2380.72	260	37
2382.42	252	36
2384.12	257	27
2385.82	238	33
2387.53	251	40
2389.23	243	32
2390.93	239	36
2392.63	238	37
2394.33	230	16
2396.03	226	12
2397.73	262	18
2399.43	234	34
2401.13	252	34
2402.82	252	20
2404.52	230	32
2406.22	258	27
2407.92	249	14
2409.61	245	54
2411.31	237	34
2413.01	271	18
2414.7	246	14
2416.4	246	24
2418.09	255	14
2419.79	260	14
2421.48	228	30
2423.17	227	21
2424.87	263	16
2426.56	237	35
2428.25	266	20
2429.95	250	24
2431.64	249	26
2433.33	253	39
2435.02	246	33
2436.71	265	33
2438.4	264	47
2440.09	249	39
2441.78	261	31
2443.47	239	42
2445.16	225	46
2446.85	233	40
2448.54	259	50
2450.22	255	42
2451.91	248	33
2453.6	247	49
2455.28	240	62
2456.97	244	56
2458.66	260	43
2460.34	250	36
2462.03	261	48
2463.71	242	44
2465.4	243	36
2467.08	265	60
2468.76	240	56
2470.45	270	41
2472.13	253	51
2473.81	244	43
2475.49	263	53
2477.18	264	34
2478.86	254	63
2480.54	247	40
2482.22	229	42
2483.9	248	48
2485.58	255	23
2487.26	238	28
2488.94	230	34
2490.62	239	28
2492.29	252	21
2493.97	246	20
2495.65	245	27
2497.33	248	39
2499	240	19
2500.68	223	22
2502.36	248	24
2504.03	238	19
2505.71	262	41
2507.38	244	21
2509.06	253	14
2510.73	262	35
2512.41	248	49
2514.08	248	37
2515.75	242	36
2517.43	260	33
2519.1	255	18
2520.77	250	26
2522.44	236	25
2524.11	252	35
2525.78	260	33
2527.45	253	25
2529.12	230	33
2530.79	248	33
2532.46	250	27
2534.13	260	18
2535.8	251	16
2537.47	244	39
2539.14	265	52
2540.81	251	21
2542.47	285	37
2544.14	256	17
2545.81	231	13
2547.47	261	31
2549.14	260	33
2550.8	241	46
2552.47	241	34
2554.13	266	31
2555.8	268	6
2557.46	269	34
2559.12	242	32
2560.79	262	16
2562.45	222	46
2564.11	226	31
2565.78	240	21
2567.44	255	36
2569.1	267	37
2570.76	238	21
2572.42	255	24
2574.08	238	47
2575.74	268	29
2577.4	230	39
2579.06	280	41
2580.72	266	42
2582.38	273	32
2584.03	248	39
2585.69	252	53
2587.35	257	44
2589.01	245	22
2590.66	262	36
2592.32	245	27
2593.97	271	37
2595.63	257	14
2597.28	256	20
2598.94	261	31
2600.59	250	46
2602.25	258	40
2603.9	271	30
2605.55	259	23
2607.21	251	42
2608.86	267	22
2610.51	263	4
2612.16	253	37
2613.82	243	30
2615.47	254	26
2617.12	244	45
2618.77	277	43
2620.42	255	52
2622.07	272	51
2623.72	262	28
2625.37	257	36
2627.01	251	11
2628.66	247	40
2630.31	261	32
2631.96	282	28
2633.6	247	51
2635.25	253	52
2636.9	260	43
2638.54	264	59
2640.19	240	68
2641.83	235	42
2643.48	276	61
2645.12	246	76
2646.77	245	70
2648.41	263	52
2650.05	261	78
2651.7	271	84
2653.34	231	64
2654.98	247	99
2656.63	262	99
2658.27	267	104
2659.91	250	124
2661.55	257	137
2663.19	213	149
2664.83	260	184
2666.47	265	202
2668.11	261	224
2669.75	278	265
2671.39	270	296
2673.03	279	323
2674.66	273	366
2676.3	259	341
2677.94	247	364
2679.58	259	404
2681.21	257	430
2682.85	261	424
2684.48	260	426
2686.12	264	406
2687.75	255	391
2689.39	248	390
2691.02	275	334
2692.66	276	291
2694.29	263	281
2695.92	258	280
2697.56	280	240
2699.19	265	190
2700.82	247	159
2702.45	260	183
2704.09	287	154
2705.72	270	133
2707.35	238	115
2708.98	233	101
2710.61	251	84
2712.24	243	85
2713.87	248	84
2715.5	247	82
2717.13	251	81
2718.75	271	50
2720.38	258	68
2722.01	259	62
2723.64	263	53
2725.26	252	51
2726.89	262	56
2728.52	251	64
2730.14	275	31
2731.77	252	60
2733.39	262	78
2735.02	260	32
2736.64	266	47
2738.27	239	61
2739.89	249	44
2741.51	258	55
2743.14	252	43
2744.76	272	43
2746.38	268	31
2748	250	35
2749.62	241	40
2751.25	249	33
2752.87	261	37
2754.49	244	41
2756.11	249	30
2757.73	240	33
2759.35	246	28
2760.97	241	23
2762.58	243	47
2764.2	266	30
2765.82	251	32
2767.44	252	39
2769.06	237	14
2770.67	231	43
2772.29	250	23
2773.9	252	16
2775.52	227	22
2777.14	243	31
2778.75	248	42
2780.37	268	32
2781.98	244	26
2783.59	236	34
2785.21	273	28
2786.82	266	56
2788.44	254	17
2790.05	269	20
2791.66	241	37
2793.27	254	26
2794.88	256	17
2796.49	268	33
2798.11	242	35
2799.72	243	26
2801.33	242	20
2802.94	251	31
2804.55	246	36
2806.16	277	25
2807.76	238	41
2809.37	248	30
2810.98	241	25
2812.59	246	31
2814.2	269	28
2815.8	254	26
2817.41	259	32
2819.02	242	41
2820.62	256	27
2822.23	268	23
2823.83	257	19
2825.44	251	45
2827.04	252	13
2828.65	268	11
2830.25	243	42
2831.85	247	42
2833.46	263	25
2835.06	259	25
2836.66	235	37
2838.27	253	33
2839.87	256	16
2841.47	229	41
2843.07	252	44
2844.67	258	45
2846.27	255	45
2847.87	252	28
2849.47	254	9
2851.07	243	22
2852.67	246	42
2854.27	246	20
2855.87	242	24
2857.46	244	32
2859.06	249	33
2860.66	259	23
2862.26	250	31
2863.85	260	29
2865.45	245	53
2867.04	250	24
2868.64	234	27
2870.24	248	32
2871.83	259	14
2873.42	272	35
2875.02	247	17
2876.61	240	23
2878.21	229	17
2879.8	257	29
2881.39	252	14
2882.98	232	29
2884.58	244	46
2886.17	277	28
2887.76	240	7
2889.35	239	35
2890.94	262	21
2892.53	258	20
2894.12	257	34
2895.71	262	11
2897.3	250	40
2898.89	244	14
2900.48	235	13
2902.07	236	43
2903.65	250	16
2905.24	247	28
2906.83	265	18
2908.42	257	29
2910	248	30
2911.59	274	34
2913.17	259	25
2914.76	265	29
2916.34	249	22
2917.93	262	20
2919.51	278	32
2921.1	258	42
2922.68	254	39
2924.27	265	46
2925.85	234	44
2927.43	262	5
2929.01	274	17
2930.6	272	37
2932.18	239	35
2933.76	251	18
2935.34	258	26
2936.92	247	46
2938.5	254	42
2940.08	263	20
2941.66	248	34
2943.24	236	19
2944.82	598	359

## Sheet: Fig. 4c
Gate voltage (V)	Drain current (before) (A)	Drain current (after) (A)
20	1.1592e-06	8.71743e-07
21	1.14501e-06	8.49335e-07
22	1.12781e-06	8.25814e-07
23	1.10692e-06	8.03967e-07
24	1.07365e-06	7.83402e-07
25	1.0635e-06	7.63108e-07
26	1.04482e-06	7.37878e-07
27	1.02704e-06	7.16851e-07
28	1.00466e-06	6.93135e-07
29	9.8627e-07	6.69858e-07
30	9.6984e-07	6.49367e-07
31	9.5628e-07	6.24799e-07
32	9.3431e-07	5.99446e-07
33	9.1335e-07	5.73482e-07
34	8.9464e-07	5.47419e-07
35	8.7504e-07	5.25378e-07
36	8.40763e-07	5.02685e-07
37	8.25346e-07	4.81137e-07
38	8.07558e-07	4.63062e-07
39	7.90224e-07	4.50419e-07
40	7.69267e-07	4.37385e-07
41	7.50468e-07	4.42559e-07
42	7.25053e-07	4.48242e-07
43	7.10359e-07	4.63231e-07
44	6.86001e-07	4.82794e-07
45	6.6995e-07	5.00487e-07
46	6.48833e-07	5.19739e-07
47	6.3092e-07	5.36914e-07
48	6.09784e-07	5.50742e-07
49	5.9234e-07	5.75099e-07
50	5.77496e-07	5.91163e-07
51	5.69688e-07	6.20398e-07
52	5.5932e-07	6.28003e-07
53	5.55412e-07	6.45123e-07
54	5.5615e-07	6.70865e-07
55	5.62104e-07	6.92477e-07
56	5.73507e-07	7.0757e-07
57	5.82904e-07	7.33938e-07
58	6.03484e-07	7.45518e-07
59	6.2486e-07	7.6391e-07
60	6.45539e-07	7.66958e-07

## Sheet: Fig. 4d & 4e
Time (min)	Drain current w/ waiting time of 1 min (A)	Time (min)	Drain current w/ waiting time of 7 min (A)
0.0173387	1.06301e-05	0.0174238	4.30765e-06
0.0343827	1.07968e-05	0.0344655	4.38749e-06
0.051422	1.09577e-05	0.051503	4.48146e-06
0.0684595	1.10382e-05	0.0685407	4.55741e-06
0.085497	1.115e-05	0.0855778	4.6026e-06
0.102535	1.12255e-05	0.102615	4.64706e-06
0.119572	1.13058e-05	0.119654	4.68792e-06
0.13661	1.13948e-05	0.136692	4.74588e-06
0.153647	1.14443e-05	0.153729	4.75186e-06
0.170685	1.15238e-05	0.170767	4.78746e-06
0.187723	1.15818e-05	0.187805	4.82177e-06
0.20476	1.16599e-05	0.204842	4.81983e-06
0.221798	1.17142e-05	0.22188	4.85526e-06
0.238837	1.17671e-05	0.238917	4.87342e-06
0.255875	1.18193e-05	0.255957	4.891e-06
0.272913	1.18802e-05	0.272993	4.91714e-06
0.289952	1.1915e-05	0.290032	4.91363e-06
0.30699	1.19737e-05	0.307068	4.94499e-06
0.324027	1.20477e-05	0.324107	4.93659e-06
0.341065	1.20415e-05	0.341143	4.95617e-06
0.358103	1.20903e-05	0.358183	4.95477e-06
0.37514	1.21842e-05	0.375222	4.97661e-06
0.392178	1.21494e-05	0.39226	4.97097e-06
0.409215	1.22173e-05	0.409298	4.97532e-06
0.426253	1.22954e-05	0.426335	5.00032e-06
0.443293	1.22398e-05	0.443373	4.97694e-06
0.460332	1.23287e-05	0.460412	4.99169e-06
0.47737	1.2401e-05	0.47745	4.98521e-06
0.494408	1.23739e-05	0.494487	4.99814e-06
0.511452	1.24172e-05	0.511525	4.97148e-06
0.52849	1.24897e-05	0.528563	4.98099e-06
0.545527	1.24973e-05	0.545602	4.99577e-06
0.562565	1.25152e-05	0.562638	4.98698e-06
0.579603	1.25924e-05	0.579677	4.98315e-06
0.59664	1.25945e-05	0.596713	4.96684e-06
0.613678	1.25889e-05	0.613752	4.97737e-06
0.630715	1.26609e-05	0.63079	4.96422e-06
0.647752	1.2679e-05	0.647828	4.97487e-06
0.66479	1.26704e-05	0.664867	4.95976e-06
0.681828	1.27653e-05	0.681905	4.97445e-06
0.698867	1.27581e-05	0.698943	4.93985e-06
0.715903	1.27336e-05	0.71598	4.96705e-06
0.732942	1.28244e-05	0.733018	4.94817e-06
0.749978	1.28251e-05	0.750055	4.95471e-06
0.767017	1.28363e-05	0.767093	4.91608e-06
0.784055	1.28918e-05	0.78413	4.92785e-06
0.801093	1.28805e-05	0.801168	4.9222e-06
0.818132	1.28896e-05	0.818207	4.93372e-06
0.835168	1.29621e-05	0.835243	4.8922e-06
0.852208	1.2965e-05	0.852282	4.90766e-06
0.869247	1.29431e-05	0.86932	4.91073e-06
0.886285	1.30141e-05	0.886358	4.92106e-06
0.903323	1.30124e-05	0.903395	4.88122e-06
0.920362	1.30257e-05	0.920433	4.88812e-06
0.9374	1.30727e-05	0.937472	4.883e-06
0.954437	1.30756e-05	0.95451	4.89351e-06
0.971475	1.30895e-05	0.971547	4.86529e-06
0.988513	1.31109e-05	0.988585	4.87604e-06
1.00555	1.31294e-05	1.00562	4.86719e-06
1.02259	1.31673e-05	1.02266	4.86858e-06
1.03963	1.31444e-05	1.0397	4.84745e-06
1.05666	1.31686e-05	1.05673	4.84845e-06
1.0737	1.31153e-05	1.07377	4.85e-06
1.09074	1.298e-05	1.09081	4.85047e-06
1.10778	1.29114e-05	1.10785	4.84089e-06
1.12482	1.27071e-05	1.12488	4.82113e-06
1.14186	1.23195e-05	1.14192	4.83251e-06
1.15889	1.20451e-05	1.15896	4.81896e-06
1.17593	1.17371e-05	1.176	4.82381e-06
1.19297	1.13397e-05	1.19304	4.79964e-06
1.21001	1.09292e-05	1.21008	4.82759e-06
1.22704	1.05662e-05	1.22712	4.78409e-06
1.24408	1.01715e-05	1.24416	4.80027e-06
1.26112	9.7752e-06	1.26119	4.78209e-06
1.27816	9.4182e-06	1.27823	4.80844e-06
1.2952	9.0619e-06	1.29527	4.76071e-06
1.31228	8.72957e-06	1.31231	4.77603e-06
1.32932	8.35542e-06	1.32934	4.77545e-06
1.34635	8.07678e-06	1.34638	4.78368e-06
1.36339	7.81265e-06	1.36342	4.75309e-06
1.38043	7.5317e-06	1.38046	4.74958e-06
1.39747	7.31773e-06	1.39749	4.76327e-06
1.4145	7.14079e-06	1.41453	4.76302e-06
1.43154	6.88618e-06	1.43157	4.7506e-06
1.44858	6.7346e-06	1.44861	4.73495e-06
1.46562	6.62001e-06	1.46565	4.75014e-06
1.48265	6.41815e-06	1.48268	4.72537e-06
1.49969	6.31293e-06	1.49972	4.73426e-06
1.51673	6.19519e-06	1.51676	4.72505e-06
1.53377	6.06812e-06	1.5338	4.72336e-06
1.5508	5.97558e-06	1.55083	4.71568e-06
1.56784	5.92084e-06	1.56787	4.7109e-06
1.58488	5.79303e-06	1.58491	4.73389e-06
1.60192	5.72776e-06	1.60195	4.68183e-06
1.61896	5.6795e-06	1.61899	4.69952e-06
1.63599	5.58498e-06	1.63603	4.71233e-06
1.65303	5.55996e-06	1.65307	4.694e-06
1.67007	5.51462e-06	1.6701	4.69149e-06
1.68712	5.47051e-06	1.68715	4.67216e-06
1.70415	5.43982e-06	1.70418	4.69037e-06
1.72118	5.40065e-06	1.72122	4.67053e-06
1.73823	5.36684e-06	1.73825	4.67256e-06
1.75527	5.31543e-06	1.7553	4.6855e-06
1.7723	5.26675e-06	1.77233	4.6583e-06
1.78933	5.24751e-06	1.78937	4.6551e-06
1.80638	5.22725e-06	1.8064	4.65207e-06
1.82342	5.18159e-06	1.82345	4.66517e-06
1.84045	5.19514e-06	1.84048	4.64124e-06
1.8575	5.14815e-06	1.85752	4.64321e-06
1.87453	5.13356e-06	1.87455	4.65271e-06
1.89157	5.14133e-06	1.8916	4.63183e-06
1.9086	5.10979e-06	1.90863	4.6322e-06
1.92565	5.08887e-06	1.92567	4.61469e-06
1.94268	5.0865e-06	1.94272	4.6326e-06
1.95972	5.05894e-06	1.95977	4.61461e-06
1.97675	5.05711e-06	1.97682	4.60686e-06
1.9938	5.04318e-06	1.99385	4.62438e-06
2.01083	5.01974e-06	2.0109	4.59622e-06
2.02787	5.01166e-06	2.02793	4.60098e-06
2.04492	4.97926e-06	2.04497	4.58249e-06
2.06195	5.00277e-06	2.062	4.5987e-06
2.07898	4.98698e-06	2.07905	4.5785e-06
2.09602	4.9706e-06	2.09608	4.58822e-06
2.11307	4.96074e-06	2.11312	4.59758e-06
2.1301	4.95104e-06	2.13015	4.58515e-06
2.14713	4.95407e-06	2.1472	4.58548e-06
2.16417	4.92784e-06	2.16423	4.56531e-06
2.18122	4.92957e-06	2.18127	4.58758e-06
2.19825	4.91227e-06	2.1983	4.55354e-06
2.21528	4.8956e-06	2.21535	4.57778e-06
2.23232	4.91373e-06	2.23238	4.5643e-06
2.24937	4.86439e-06	2.24942	4.56883e-06
2.2664	4.88524e-06	2.26645	4.55917e-06
2.28343	4.88001e-06	2.2835	4.55148e-06
2.30047	4.8784e-06	2.30053	4.56296e-06
2.31752	4.85819e-06	2.31757	4.54708e-06
2.33455	4.85247e-06	2.3346	4.54571e-06
2.35158	4.86357e-06	2.35165	4.52568e-06
2.36863	4.84276e-06	2.36868	4.54678e-06
2.38567	4.83176e-06	2.38572	4.51719e-06
2.4027	4.84511e-06	2.40277	4.52238e-06
2.41973	4.8313e-06	2.4198	4.53594e-06
2.43678	4.8336e-06	2.43683	4.52864e-06
2.45382	4.79135e-06	2.45388	4.53335e-06
2.47085	4.81168e-06	2.47092	4.51658e-06
2.4879	4.79073e-06	2.48795	4.54105e-06
2.50493	4.79475e-06	2.50498	4.51212e-06
2.52197	4.81493e-06	2.52203	4.5131e-06
2.53902	4.76315e-06	2.53907	4.53303e-06
2.55605	4.7873e-06	2.5561	4.51321e-06
2.57308	4.78855e-06	2.57315	4.51021e-06
2.59012	4.78204e-06	2.59018	4.51499e-06
2.60717	4.78037e-06	2.60722	4.52139e-06
2.6242	4.77328e-06	2.62425	4.5052e-06
2.64123	4.77563e-06	2.6413	4.49129e-06
2.65827	4.7581e-06	2.65833	4.52036e-06
2.67532	4.75518e-06	2.67537	4.48192e-06
2.69235	4.76524e-06	2.6924	4.48743e-06
2.70938	4.72901e-06	2.70945	4.4957e-06
2.72642	4.72441e-06	2.72648	4.48937e-06
2.74347	4.7515e-06	2.74352	4.49045e-06
2.7605	4.71855e-06	2.76055	4.48707e-06
2.77753	4.71712e-06	2.7776	4.50143e-06
2.79458	4.73034e-06	2.79463	4.48036e-06
2.81162	4.71808e-06	2.81167	4.47109e-06
2.82865	4.71381e-06	2.82872	4.4881e-06
2.84568	4.68751e-06	2.84575	4.4608e-06
2.86273	4.69079e-06	2.86278	4.47375e-06
2.87977	4.67978e-06	2.87983	4.48745e-06
2.8968	4.68917e-06	2.89687	4.45549e-06
2.91383	4.69639e-06	2.9139	4.46275e-06
2.93088	4.66121e-06	2.93093	4.48322e-06
2.94792	4.65953e-06	2.94798	4.4484e-06
2.96495	4.63957e-06	2.96502	4.45963e-06
2.982	4.66223e-06	2.98205	4.47238e-06
2.99903	4.64613e-06	2.99908	4.45192e-06
3.01607	4.64713e-06	3.01613	4.45433e-06
3.0331	4.66062e-06	3.03317	4.45511e-06
3.05015	4.60592e-06	3.0502	4.44214e-06
3.06718	4.61504e-06	3.06723	4.45315e-06
3.08422	4.63397e-06	3.08428	4.44379e-06
3.10125	4.61545e-06	3.10132	4.45229e-06
3.1183	4.62427e-06	3.11835	4.45107e-06
3.13533	4.58674e-06	3.1354	4.43991e-06
3.15237	4.61681e-06	3.15243	4.45179e-06
3.16942	4.59993e-06	3.16947	4.44642e-06
3.18645	4.59723e-06	3.1865	4.4254e-06
3.20348	4.61398e-06	3.20355	4.44216e-06
3.22053	4.58224e-06	3.22058	4.42779e-06
3.23757	4.60398e-06	3.23762	4.42361e-06
3.25462	4.61337e-06	3.25467	4.43606e-06
3.27165	4.58024e-06	3.2717	4.40559e-06
3.28868	4.59742e-06	3.28873	4.41969e-06
3.30573	4.60964e-06	3.30577	4.43169e-06
3.32277	4.57556e-06	3.32282	4.41633e-06
3.33982	4.58041e-06	3.33985	4.42282e-06
3.35687	4.59631e-06	3.35688	4.40575e-06
3.3739	4.55843e-06	3.37392	4.4124e-06
3.39093	4.57302e-06	3.39097	4.40434e-06
3.40798	4.58487e-06	3.408	4.40517e-06
3.42503	4.56737e-06	3.42503	4.41509e-06
3.44207	4.576e-06	3.44208	4.40946e-06
3.4591	4.58154e-06	3.45912	4.40886e-06
3.47615	4.54676e-06	3.47615	4.40976e-06
3.49318	4.56611e-06	3.49318	4.41734e-06
3.51022	4.58802e-06	3.51023	4.39697e-06
3.52727	4.54627e-06	3.52727	4.40047e-06
3.5443	4.56961e-06	3.5443	4.41968e-06
3.56133	4.58123e-06	3.56133	4.39074e-06
3.57837	4.55871e-06	3.57838	4.39715e-06
3.59542	4.56281e-06	3.59542	4.40629e-06
3.61245	4.56478e-06	3.61245	4.4068e-06
3.62948	4.59012e-06	3.62948	4.39937e-06
3.64652	4.58558e-06	3.64653	4.39891e-06
3.66357	4.55849e-06	3.66357	4.40342e-06
3.6806	4.56604e-06	3.6806	4.37647e-06
3.69763	4.57957e-06	3.69765	4.37856e-06
3.71467	4.57018e-06	3.71468	4.38752e-06
3.73172	4.58827e-06	3.73172	4.38565e-06
3.74875	4.56453e-06	3.74875	4.37658e-06
3.76578	4.57377e-06	3.7658	4.39171e-06
3.78283	4.59401e-06	3.78283	4.37966e-06
3.79987	4.5737e-06	3.79987	4.37235e-06
3.8169	4.58386e-06	3.8169	4.37596e-06
3.83393	4.57236e-06	3.83395	4.37984e-06
3.85098	4.57985e-06	3.85098	4.37734e-06
3.86802	4.58181e-06	3.86802	4.38096e-06
3.88505	4.57397e-06	3.88505	4.37087e-06
3.90208	4.57719e-06	3.9021	4.34909e-06
3.91913	4.57302e-06	3.91913	4.37459e-06
3.93617	4.55549e-06	3.93617	4.35124e-06
3.9532	4.58172e-06	3.95322	4.35706e-06
3.97023	4.56678e-06	3.97025	4.37928e-06
3.98728	4.55301e-06	3.98728	4.34278e-06
4.00432	4.58514e-06	4.00433	4.35297e-06
4.02135	4.57187e-06	4.02137	4.36441e-06
4.0384	4.57478e-06	4.0384	4.34538e-06
4.05543	4.59527e-06	4.05547	4.34945e-06
4.07247	4.56196e-06	4.07252	4.36666e-06
4.0895	4.57288e-06	4.08955	4.34023e-06
4.10655	4.59955e-06	4.10658	4.34805e-06
4.12358	4.57737e-06	4.12363	4.35206e-06
4.14062	4.568e-06	4.14067	4.35528e-06
4.15767	4.57926e-06	4.15772	4.35544e-06
4.1747	4.54985e-06	4.17475	4.34292e-06
4.19173	4.55901e-06	4.19178	4.35214e-06
4.20878	4.55639e-06	4.20883	4.33532e-06
4.22582	4.53913e-06	4.22587	4.3473e-06
4.24285	4.53033e-06	4.2429	4.34798e-06
4.25988	4.5573e-06	4.25993	4.35671e-06
4.27693	4.5396e-06	4.27698	4.35072e-06
4.29397	4.54299e-06	4.29402	4.32974e-06
4.311	4.55965e-06	4.31105	4.34639e-06
4.32805	4.51846e-06	4.32808	4.31462e-06
4.34508	4.52464e-06	4.34513	4.33355e-06
4.36212	4.55404e-06	4.36217	4.33378e-06
4.37915	4.52506e-06	4.3792	4.3389e-06
4.3962	4.53187e-06	4.39625	4.33279e-06
4.41323	4.52964e-06	4.41328	4.32994e-06
4.43027	4.5176e-06	4.43032	4.33657e-06
4.4473	4.51227e-06	4.44737	4.33737e-06
4.46435	4.5144e-06	4.4644	4.33838e-06
4.48138	4.52553e-06	4.48143	4.3278e-06
4.49842	4.50103e-06	4.49847	4.34577e-06
4.51547	4.5004e-06	4.51552	4.3132e-06
4.5325	4.4894e-06	4.53255	4.32913e-06
4.54953	4.47652e-06	4.54958	4.31163e-06
4.56658	4.49913e-06	4.56662	4.3178e-06
4.58362	4.48536e-06	4.58367	4.30467e-06
4.60065	4.48801e-06	4.6007	4.31049e-06
4.61768	4.49218e-06	4.61773	4.31936e-06
4.63473	4.45086e-06	4.63478	4.30247e-06
4.65177	4.46269e-06	4.65182	4.31898e-06
4.6688	4.46259e-06	4.66885	4.30056e-06
4.68583	4.4648e-06	4.68588	4.31761e-06
4.70288	4.48693e-06	4.70293	4.29794e-06
4.71992	4.46063e-06	4.71997	4.30271e-06
4.73695	4.47556e-06	4.737	4.31751e-06
4.754	4.45847e-06	4.75405	4.30875e-06
4.77103	4.44225e-06	4.77108	4.30687e-06
4.78807	4.45889e-06	4.78812	4.29677e-06
4.8051	4.44495e-06	4.80515	4.31664e-06
4.82215	4.41616e-06	4.8222	4.2909e-06
4.83918	4.443e-06	4.83923	4.30771e-06
4.85622	4.40956e-06	4.85627	4.28891e-06
4.87327	4.42309e-06	4.87332	4.30217e-06
4.8903	4.42257e-06	4.89035	4.27714e-06
4.90733	4.42942e-06	4.90738	4.28821e-06
4.92437	4.43303e-06	4.92443	4.28984e-06
4.94142	4.42903e-06	4.94147	4.29371e-06
4.95845	4.45063e-06	4.9585	4.2778e-06
4.97548	4.41408e-06	4.97553	4.28265e-06
4.99253	4.42292e-06	4.99258	4.28482e-06
5.00957	4.40478e-06	5.00962	4.28748e-06
5.0266	4.40126e-06	5.02665	4.28145e-06
5.04363	4.40058e-06	5.0437	4.27133e-06
5.06068	4.3873e-06	5.06073	4.28194e-06
5.07772	4.40798e-06	5.07777	4.27718e-06
5.09475	4.36796e-06	5.0948	4.28594e-06
5.11178	4.38172e-06	5.11185	4.26633e-06
5.12883	4.40492e-06	5.12888	4.28619e-06
5.14587	4.39001e-06	5.14592	4.25302e-06
5.1629	4.40128e-06	5.16295	4.27103e-06
5.17995	4.38852e-06	5.18	4.27673e-06
5.19698	4.3947e-06	5.19703	4.28518e-06
5.21402	4.3976e-06	5.21407	4.28025e-06
5.23105	4.38288e-06	5.23112	4.26948e-06
5.2481	4.38342e-06	5.24815	4.28104e-06
5.26513	4.35918e-06	5.26518	4.25318e-06
5.28217	4.35986e-06	5.28222	4.26377e-06
5.2992	4.36851e-06	5.29927	4.27223e-06
5.31625	4.34415e-06	5.3163	4.2677e-06
5.33328	4.34439e-06	5.33333	4.27184e-06
5.35032	4.32044e-06	5.35037	4.26573e-06
5.36737	4.3476e-06	5.36742	4.28406e-06
5.3844	4.34788e-06	5.38445	4.25372e-06
5.40143	4.32902e-06	5.40148	4.25922e-06
5.41848	4.34975e-06	5.41853	4.27059e-06
5.43552	4.32866e-06	5.43557	4.244e-06
5.45255	4.31469e-06	5.4526	4.25311e-06
5.4696	4.32001e-06	5.46963	4.2483e-06
5.48663	4.28987e-06	5.48668	4.26148e-06
5.50367	4.30482e-06	5.50372	4.26763e-06
5.5207	4.30726e-06	5.52075	4.25146e-06
5.53775	4.28109e-06	5.5378	4.27019e-06
5.55478	4.29654e-06	5.55483	4.24936e-06
5.57182	4.27965e-06	5.57187	4.24678e-06
5.58885	4.27593e-06	5.5889	4.2677e-06
5.6059	4.26516e-06	5.60595	4.23796e-06
5.62293	4.26347e-06	5.62298	4.23993e-06
5.63997	4.25822e-06	5.64002	4.24435e-06
5.657	4.25171e-06	5.65707	4.24308e-06
5.67405	4.25007e-06	5.6741	4.25058e-06
5.69108	4.22892e-06	5.69113	4.24591e-06
5.70812	4.25417e-06	5.70818	4.25126e-06
5.72517	4.2097e-06	5.72522	4.23481e-06
5.7422	4.2199e-06	5.74225	4.23508e-06
5.75923	4.22911e-06	5.75928	4.25411e-06
5.77627	4.20756e-06	5.77633	4.21714e-06
5.79332	4.22472e-06	5.79337	4.22416e-06
5.81035	4.2001e-06	5.8104	4.23844e-06
5.82738	4.20767e-06	5.82745	4.22262e-06
5.84442	4.1835e-06	5.84448	4.23117e-06
5.86147	4.20001e-06	5.86152	4.23281e-06
5.8785	4.18165e-06	5.87855	4.23162e-06
5.89553	4.1951e-06	5.8956	4.23688e-06
5.91258	4.17566e-06	5.91263	4.21937e-06
5.92962	4.16272e-06	5.92967	4.24476e-06
5.94665	4.1714e-06	5.94672	4.22544e-06
5.96368	4.16966e-06	5.96375	4.21849e-06
5.98073	4.16961e-06	5.98078	4.23611e-06
5.99777	4.15245e-06	5.99782	4.21762e-06
6.0148	4.16003e-06	6.01487	4.2245e-06
6.03183	4.13884e-06	6.0319	4.23483e-06
6.04888	4.15309e-06	6.04893	4.21626e-06
6.06592	4.14292e-06	6.06598	4.21698e-06
6.08295	4.13998e-06	6.08302	4.23634e-06
6.09998	4.12395e-06	6.10005	4.21183e-06
6.11703	4.11739e-06	6.1171	4.21527e-06
6.13407	4.10615e-06	6.13413	4.22969e-06
6.1511	4.13022e-06	6.15117	4.21084e-06
6.16815	4.11055e-06	6.1682	4.21631e-06
6.18518	4.09649e-06	6.18525	4.22725e-06
6.20222	4.11643e-06	6.20228	4.20157e-06
6.21927	4.09083e-06	6.21932	4.20046e-06
6.2363	4.10404e-06	6.23635	4.22117e-06
6.25333	4.0778e-06	6.2534	4.20379e-06
6.27037	4.09911e-06	6.27043	4.2016e-06
6.28742	4.08185e-06	6.28747	4.22432e-06
6.30445	4.08358e-06	6.3045	4.18984e-06
6.32148	4.08811e-06	6.32157	4.20497e-06
6.33852	4.07217e-06	6.3386	4.21828e-06
6.35557	4.07969e-06	6.35565	4.19669e-06
6.3726	4.07166e-06	6.3727	4.19867e-06
6.38963	4.06017e-06	6.38973	4.20719e-06
6.40667	4.07403e-06	6.40677	4.20189e-06
6.42372	4.06675e-06	6.4238	4.18859e-06
6.44075	4.05945e-06	6.44085	4.20297e-06
6.45778	4.05259e-06	6.45788	4.19603e-06
6.47483	4.05383e-06	6.47492	4.18423e-06
6.49187	4.03926e-06	6.49197	4.20048e-06
6.5089	4.04602e-06	6.509	4.18873e-06
6.52593	4.02997e-06	6.52603	4.18591e-06
6.54298	4.06616e-06	6.54307	4.19244e-06
6.56002	4.03822e-06	6.56012	4.16983e-06
6.57705	4.04462e-06	6.57715	4.17896e-06
6.5941	4.03115e-06	6.59418	4.20166e-06
6.61113	4.03624e-06	6.61122	4.17973e-06
6.62817	4.01794e-06	6.62827	4.18174e-06
6.64522	4.02426e-06	6.6453	4.19452e-06
6.66225	4.0137e-06	6.66233	4.16877e-06
6.67928	4.03493e-06	6.67937	4.1682e-06
6.69632	4.00848e-06	6.69642	4.19263e-06
6.71337	4.01506e-06	6.71345	4.1726e-06
6.7304	3.99906e-06	6.73048	4.169e-06
6.74745	4.0105e-06	6.74752	4.18249e-06
6.76448	3.9761e-06	6.76457	4.17969e-06
6.78152	3.98348e-06	6.7816	4.1664e-06
6.79855	3.99683e-06	6.79863	4.17992e-06
6.8156	3.97479e-06	6.81568	4.17145e-06
6.83263	3.98627e-06	6.83272	4.16045e-06
6.84967	3.98608e-06	6.84975	4.1772e-06
6.86672	3.98798e-06	6.86678	4.15804e-06
6.88375	3.99797e-06	6.88383	4.16313e-06
6.90078	3.99058e-06	6.90087	4.1803e-06
6.91783	3.99652e-06	6.91792	4.16714e-06
6.93487	3.95747e-06	6.93495	4.16698e-06
6.95192	3.96654e-06	6.95198	4.18059e-06
6.96895	3.97999e-06	6.96902	4.15836e-06
6.98598	3.97166e-06	6.98607	4.12608e-06
7.00303	3.98164e-06	7.0031	3.79071e-06
7.02008	3.96606e-06	7.02013	3.74637e-06
7.03712	3.98546e-06	7.03717	3.78682e-06
7.05415	3.97415e-06	7.05422	3.85109e-06
7.0712	3.96639e-06	7.07125	3.94689e-06
7.08825	3.97374e-06	7.08863	4.37337e-06
7.10528	3.94812e-06	7.10567	4.33744e-06
7.12232	3.96711e-06	7.1227	4.37961e-06
7.13937	3.97826e-06	7.13975	4.42492e-06
7.1564	3.97452e-06	7.15678	4.47125e-06
7.17343	3.97421e-06	7.17382	4.52002e-06
7.19048	3.96151e-06	7.19085	4.5254e-06
7.20752	3.97194e-06	7.2079	4.61773e-06
7.22455	3.94791e-06	7.22493	4.69907e-06
7.24158	3.9445e-06	7.24197	4.67544e-06
7.25863	3.96987e-06	7.25902	4.66367e-06
7.27567	3.9591e-06	7.27605	4.70721e-06
7.2927	3.9593e-06	7.29308	4.7184e-06
7.30973	3.96808e-06	7.31013	4.74613e-06
7.32678	3.96705e-06	7.32717	4.77588e-06
7.34382	3.96726e-06	7.3442	4.77352e-06
7.36085	3.95891e-06	7.36123	4.76382e-06
7.3779	3.96405e-06	7.37828	4.8391e-06
7.39493	3.95202e-06	7.39532	4.85818e-06
7.41197	3.96157e-06	7.41235	4.88112e-06
7.429	3.94517e-06	7.42938	4.93056e-06
7.44605	3.93051e-06	7.44643	4.96288e-06
7.46308	3.94928e-06	7.46347	5.04083e-06
7.48012	3.93587e-06	7.4805	5.0436e-06
7.49715	3.93743e-06	7.49755	5.00373e-06
7.5142	3.94378e-06	7.51458	4.9752e-06
7.53123	3.93029e-06	7.53162	4.96971e-06
7.54827	3.94375e-06	7.54865	4.96805e-06
7.56532	3.92104e-06	7.5657	4.98041e-06
7.58235	3.91697e-06	7.58273	4.97813e-06
7.59938	3.92884e-06	7.59977	4.97967e-06
7.61642	3.91711e-06	7.6168	4.98882e-06
7.63347	3.92592e-06	7.63385	5.06513e-06
7.6505	3.91449e-06	7.65088	5.0296e-06
7.66753	3.90617e-06	7.66792	4.98573e-06
7.68457	3.92102e-06	7.68497	4.9772e-06
7.70162	3.92222e-06	7.702	4.97619e-06
7.71865	3.93368e-06	7.71903	4.97172e-06
7.73568	3.92466e-06	7.73607	4.9654e-06
7.75273	3.9028e-06	7.75312	4.9779e-06
7.76977	3.91898e-06	7.77015	4.9834e-06
7.7868	3.90953e-06	7.78718	4.98457e-06
7.80385	3.89931e-06	7.80423	4.99722e-06
7.82088	3.91192e-06	7.82127	4.98877e-06
7.83792	3.89583e-06	7.8383	4.99108e-06
7.85495	3.90869e-06	7.85533	5.02126e-06
7.872	3.9144e-06	7.87238	5.01897e-06
7.88903	3.89521e-06	7.88942	5.01472e-06
7.90607	3.892e-06	7.90645	5.04182e-06
7.92312	3.89976e-06	7.92348	5.03403e-06
7.94015	3.9012e-06	7.94053	5.01614e-06
7.95718	3.91861e-06	7.95757	5.03985e-06
7.97422	3.8996e-06	7.9746	5.03661e-06
7.99127	3.91307e-06	7.99163	5.02479e-06
8.0083	3.91008e-06	8.00868	5.05514e-06
8.02533	3.9056e-06	8.02572	5.05693e-06
8.04237	3.92471e-06	8.04275	5.0482e-06
8.05942	3.90451e-06	8.0598	5.067e-06
8.07645	3.89367e-06	8.07683	5.05686e-06
8.09348	3.90271e-06	8.09387	5.06354e-06
8.11053	3.88017e-06	8.11092	5.06296e-06
8.12757	3.89531e-06	8.12795	5.06076e-06
8.1446	3.89906e-06	8.14498	5.07431e-06
8.16163	3.88649e-06	8.16202	5.08384e-06
8.17868	3.87762e-06	8.17907	5.07158e-06
8.19572	3.87255e-06	8.1961	5.0645e-06
8.21275	3.89449e-06	8.21313	5.08975e-06
8.2298	3.86048e-06	8.23018	5.05469e-06
8.24683	3.86623e-06	8.24722	5.08109e-06
8.26387	3.8721e-06	8.26425	5.10062e-06
8.2809	3.88082e-06	8.28128	5.06712e-06
8.29795	3.86786e-06	8.29833	5.07382e-06
8.31498	3.86015e-06	8.31537	5.08335e-06
8.33202	3.87184e-06	8.3324	5.07665e-06
8.34905	3.843e-06	8.34945	5.06439e-06
8.3661	3.86637e-06	8.36648	5.07166e-06
8.38313	3.85922e-06	8.38352	5.0963e-06
8.40017	3.86409e-06	8.40055	5.07967e-06
8.41722	3.85131e-06	8.4176	5.07596e-06
8.43425	3.85043e-06	8.43463	5.0989e-06
8.45128	3.87025e-06	8.45167	5.0661e-06
8.46832	3.85428e-06	8.46872	5.08004e-06
8.48537	3.8473e-06	8.48575	5.09561e-06
8.5024	3.85345e-06	8.50278	5.06442e-06
8.51943	3.86901e-06	8.51982	5.09281e-06
8.53647	3.86336e-06	8.53687	5.0992e-06
8.55352	3.85164e-06	8.5539	5.0765e-06
8.57055	3.86993e-06	8.57093	5.07237e-06
8.58758	3.83764e-06	8.58798	5.097e-06
8.60463	3.85106e-06	8.60502	5.09084e-06
8.62167	3.84083e-06	8.62205	5.09241e-06
8.6387	3.86312e-06	8.63908	5.08737e-06
8.65573	3.86051e-06	8.65613	5.07622e-06
8.67278	3.83913e-06	8.67317	5.07123e-06
8.68982	3.86177e-06	8.6902	5.06207e-06
8.70685	3.8431e-06	8.70723	5.07725e-06
8.7239	3.84212e-06	8.72428	5.07348e-06
8.74093	3.84957e-06	8.74132	5.06733e-06
8.75797	3.83141e-06	8.75835	5.06647e-06
8.775	3.84398e-06	8.77538	5.06788e-06
8.79205	3.83833e-06	8.79243	5.07186e-06
8.80908	3.84246e-06	8.80948	5.05311e-06
8.82612	3.82564e-06	8.82652	5.03584e-06
8.84315	3.81673e-06	8.84355	5.04527e-06
8.8602	3.83475e-06	8.86062	5.00771e-06
8.87723	3.82613e-06	8.87765	5.01798e-06
8.89427	3.81432e-06	8.89468	5.02275e-06
8.91132	3.84112e-06	8.91172	5.00694e-06
8.92835	3.82207e-06	8.92877	5.01291e-06
8.94538	3.83758e-06	8.9458	5.03326e-06
8.96242	3.83573e-06	8.96283	4.99461e-06
8.97947	3.8053e-06	8.97987	4.98373e-06
8.9965	3.82013e-06	8.99692	5.0161e-06
9.01353	3.82286e-06	9.01395	4.97865e-06
9.03058	3.82353e-06	9.03098	4.96592e-06
9.04762	3.82869e-06	9.04803	5.00696e-06
9.06465	3.81247e-06	9.06507	4.96928e-06
9.08168	3.82316e-06	9.0821	4.98254e-06
9.09873	3.81303e-06	9.09913	4.99691e-06
9.11577	3.81748e-06	9.11618	4.9552e-06
9.1328	3.8284e-06	9.13322	4.96571e-06
9.14983	3.80977e-06	9.15025	4.98607e-06
9.16688	3.80748e-06	9.16728	4.94079e-06
9.18392	3.8203e-06	9.18433	4.9264e-06
9.20095	3.79701e-06	9.20137	4.96082e-06
9.218	3.81247e-06	9.2184	4.93629e-06
9.23503	3.82284e-06	9.23545	4.94955e-06
9.25207	3.80616e-06	9.25248	4.93347e-06
9.2691	3.82545e-06	9.26952	4.90092e-06
9.28615	3.81549e-06	9.28655	4.90745e-06
9.30318	3.80269e-06	9.3036	4.92603e-06
9.32022	3.80643e-06	9.32063	4.88617e-06
9.33727	3.79767e-06	9.33767	4.89658e-06
9.3543	3.80322e-06	9.35472	4.88912e-06
9.37133	3.80424e-06	9.37175	4.86303e-06
9.38837	3.79005e-06	9.38878	4.87715e-06
9.40542	3.80357e-06	9.40582	4.88854e-06
9.42245	3.79038e-06	9.42287	4.86794e-06
9.43948	3.78419e-06	9.4399	4.86883e-06
9.45653	3.7984e-06	9.45693	4.87501e-06
9.47357	3.79733e-06	9.47397	4.85443e-06
9.4906	3.77129e-06	9.49102	4.84738e-06
9.50763	3.79704e-06	9.50805	4.86227e-06
9.52468	3.79255e-06	9.52508	4.84503e-06
9.54172	3.77353e-06	9.54212	4.83103e-06
9.55875	3.78754e-06	9.55917	4.83525e-06
9.5758	3.77742e-06	9.5762	4.82492e-06
9.59283	3.76387e-06	9.59323	4.80151e-06
9.60987	3.77468e-06	9.61028	4.82386e-06
9.6269	3.77384e-06	9.62732	4.79453e-06
9.64395	3.75384e-06	9.64435	4.774e-06
9.66098	3.77807e-06	9.6614	4.7876e-06
9.67802	3.77842e-06	9.67843	4.78977e-06
9.69505	3.74807e-06	9.69547	4.75805e-06
9.7121	3.76648e-06	9.7125	4.78244e-06
9.72913	3.75895e-06	9.72955	4.77766e-06
9.74617	3.75085e-06	9.74658	4.76093e-06
9.7632	3.75603e-06	9.76362	4.77686e-06
9.78025	3.74318e-06	9.78065	4.75796e-06
9.79728	3.7344e-06	9.7977	4.73934e-06
9.81432	3.75137e-06	9.81473	4.74217e-06
9.83137	3.751e-06	9.83177	4.72553e-06
9.8484	3.74038e-06	9.8488	4.73875e-06
9.86543	3.75724e-06	9.86585	4.74403e-06
9.88247	3.73978e-06	9.88288	4.73375e-06
9.89952	3.74156e-06	9.89992	4.71752e-06
9.91655	3.75614e-06	9.91697	4.72528e-06
9.93358	3.72249e-06	9.934	4.74593e-06
9.95063	3.72731e-06	9.95103	4.73392e-06
9.96767	3.7523e-06	9.96807	4.71514e-06
9.9847	3.72009e-06	9.98512	4.70042e-06
10.0017	3.72777e-06	10.0022	4.71996e-06
10.0188	3.72572e-06	10.0192	4.69342e-06
10.0358	3.72031e-06	10.0362	4.68022e-06
10.0528	3.71612e-06	10.0533	4.71376e-06
10.0699	3.71136e-06	10.0703	4.68009e-06
10.0869	3.71792e-06	10.0873	4.65256e-06
10.104	3.72251e-06	10.1044	4.68672e-06
10.121	3.70905e-06	10.1214	4.66656e-06
10.138	3.7148e-06	10.1385	4.64898e-06
10.1551	3.7177e-06	10.1555	4.65884e-06
10.1721	3.72118e-06	10.1725	4.664e-06
10.1892	3.70974e-06	10.1896	4.65808e-06
10.2062	3.71161e-06	10.2066	4.64225e-06
10.2232	3.69901e-06	10.2236	4.65274e-06
10.2403	3.70522e-06	10.2407	4.67569e-06
10.2573	3.71051e-06	10.2577	4.61005e-06
10.2744	3.70001e-06	10.2748	4.61711e-06
10.2914	3.6991e-06	10.2918	4.6266e-06
10.3085	3.70304e-06	10.3088	4.65932e-06
10.3255	3.71026e-06	10.3259	4.65265e-06
10.3425	3.68926e-06	10.3429	4.65665e-06
10.3596	3.69595e-06	10.3599	4.6573e-06
10.3766	3.70764e-06	10.377	4.65712e-06
10.3936	3.67306e-06	10.394	4.61964e-06
10.4107	3.68818e-06	10.4111	4.60851e-06
10.4277	3.71349e-06	10.4281	4.60304e-06
10.4448	3.69287e-06	10.4451	4.5586e-06
10.4618	3.69161e-06	10.4622	4.59131e-06
10.4788	3.71701e-06	10.4792	4.58037e-06
10.4959	3.68992e-06	10.4962	4.57625e-06
10.5129	3.68852e-06	10.5133	4.55989e-06
10.53	3.69578e-06	10.5303	4.56948e-06
10.547	3.70216e-06	10.5474	4.5646e-06
10.564	3.67975e-06	10.5644	4.52217e-06
10.5811	3.68554e-06	10.5815	4.55729e-06
10.5981	3.68161e-06	10.5985	4.54624e-06
10.6152	3.66458e-06	10.6155	4.56481e-06
10.6322	3.68658e-06	10.6326	4.5567e-06
10.6493	3.69232e-06	10.6496	4.5313e-06
10.6663	3.67451e-06	10.6666	4.53579e-06
10.6833	3.67523e-06	10.6837	4.48791e-06
10.7004	3.68571e-06	10.7007	4.53685e-06
10.7174	3.68092e-06	10.7178	4.54813e-06
10.7344	3.67233e-06	10.7348	4.52855e-06
10.7515	3.67756e-06	10.7518	4.53248e-06
10.7685	3.66624e-06	10.7689	4.57006e-06
10.7856	3.66605e-06	10.7859	4.56241e-06
10.8026	3.66806e-06	10.8029	4.5266e-06
10.8196	3.65709e-06	10.82	4.53219e-06
10.8367	3.63421e-06	10.837	4.50639e-06
10.8537	3.63673e-06	10.8541	4.51244e-06
10.8707	3.6608e-06	10.8711	4.47931e-06
10.8878	3.62936e-06	10.8881	4.47764e-06
10.9048	3.63457e-06	10.9052	4.49751e-06
10.9218	3.64349e-06	10.9222	4.50793e-06
10.9389	3.6222e-06	10.9392	4.50089e-06
10.9559	3.61968e-06	10.9563	4.49221e-06
10.973	3.63367e-06	10.9733	4.48287e-06
10.99	3.60627e-06	10.9903	4.44263e-06
11.007	3.61361e-06	11.0074	4.45196e-06
11.0241	3.62425e-06	11.0244	4.47766e-06
11.0411	3.604e-06	11.0415	4.52158e-06
11.0581	3.60458e-06	11.0585	4.48728e-06
11.0752	3.61398e-06	11.0755	4.49353e-06
11.0922	3.58549e-06	11.0926	4.50679e-06
11.1093	3.59793e-06	11.1096	4.48343e-06
11.1263	3.59599e-06	11.1267	4.47834e-06
11.1433	3.56592e-06	11.1437	4.44275e-06
11.1604	3.57408e-06	11.1607	4.44363e-06
11.1774	3.60771e-06	11.1778	4.48973e-06
11.1944	3.57808e-06	11.1948	4.45795e-06
11.2115	3.58195e-06	11.2119	4.46229e-06
11.2285	3.59456e-06	11.2289	4.45506e-06
11.2456	3.57205e-06	11.2459	4.45982e-06
11.2626	3.58076e-06	11.263	4.47352e-06
11.2797	3.59173e-06	11.28	4.46726e-06
11.2967	3.56762e-06	11.297	4.48447e-06
11.3137	3.57615e-06	11.3141	4.46988e-06
11.3308	3.57862e-06	11.3311	4.46781e-06
11.3478	3.55947e-06	11.3482	4.4928e-06
11.3648	3.57215e-06	11.3652	4.47466e-06
11.3819	3.58409e-06	11.3823	4.47837e-06
11.3989	3.56589e-06	11.3993	4.43283e-06
11.416	3.57275e-06	11.4163	4.44893e-06
11.433	3.58111e-06	11.4334	4.48639e-06
11.45	3.5781e-06	11.4504	4.47418e-06
11.4671	3.57507e-06	11.4674	4.49517e-06
11.4841	3.5601e-06	11.4845	4.45252e-06
11.5011	3.56732e-06	11.5015	4.48069e-06
11.5182	3.55839e-06	11.5186	4.47843e-06
11.5352	3.54813e-06	11.5356	4.47719e-06
11.5523	3.56368e-06	11.5526	4.44314e-06
11.5693	3.53825e-06	11.5697	4.44089e-06
11.5863	3.54862e-06	11.5867	4.41412e-06
11.6034	3.54903e-06	11.6037	4.42876e-06
11.6204	3.53816e-06	11.6208	4.40503e-06
11.6374	3.54686e-06	11.6378	4.41385e-06
11.6545	3.55037e-06	11.6549	4.40118e-06
11.6715	3.54931e-06	11.6719	4.40013e-06
11.6886	3.54688e-06	11.6889	4.39004e-06
11.7056	3.52737e-06	11.706	4.42312e-06
11.7226	3.53676e-06	11.723	4.37281e-06
11.7397	3.54177e-06	11.7401	4.35499e-06
11.7567	3.51904e-06	11.7571	4.37771e-06
11.7737	3.53602e-06	11.7741	4.36731e-06
11.7908	3.51083e-06	11.7912	4.32543e-06
11.8078	3.52066e-06	11.8082	4.34568e-06
11.8249	3.52756e-06	11.8252	4.33356e-06
11.8419	3.52633e-06	11.8423	4.34133e-06
11.8589	3.52701e-06	11.8593	4.30605e-06
11.876	3.51378e-06	11.8764	4.29925e-06
11.893	3.52902e-06	11.8934	4.29805e-06
11.9101	3.50383e-06	11.9104	4.25471e-06
11.9271	3.50126e-06	11.9275	4.27448e-06
11.9441	3.50032e-06	11.9445	4.28712e-06
11.9612	3.50715e-06	11.9615	4.27197e-06
11.9782	3.51767e-06	11.9786	4.26998e-06
11.9953	3.49693e-06	11.9956	4.26473e-06
12.0123	3.5054e-06	12.0127	4.24611e-06
12.0293	3.48787e-06	12.0297	4.25479e-06
12.0464	3.49263e-06	12.0467	4.29578e-06
12.0634	3.51404e-06	12.0638	4.25907e-06
12.0804	3.50213e-06	12.0808	4.2419e-06
12.0975	3.50768e-06	12.0978	4.25976e-06
12.1145	3.50118e-06	12.1149	4.24988e-06
12.1316	3.51273e-06	12.1319	4.19985e-06
12.1486	3.51441e-06	12.149	4.2022e-06
12.1656	3.50397e-06	12.166	4.18636e-06
12.1827	3.51357e-06	12.183	4.14188e-06
12.1997	3.49976e-06	12.2001	4.20425e-06
12.2167	3.49758e-06	12.2171	4.20514e-06
12.2338	3.49966e-06	12.2341	4.18949e-06
12.2508	3.50024e-06	12.2512	4.18823e-06
12.2678	3.50091e-06	12.2682	4.17817e-06
12.2849	3.48297e-06	12.2853	4.17357e-06
12.3019	3.50523e-06	12.3023	4.17807e-06
12.319	3.4793e-06	12.3193	4.15012e-06
12.336	3.48476e-06	12.3364	4.15932e-06
12.353	3.49123e-06	12.3534	4.17162e-06
12.3701	3.48742e-06	12.3704	4.12948e-06
12.3871	3.4862e-06	12.3875	4.10326e-06
12.4041	3.48286e-06	12.4045	4.10434e-06
12.4212	3.50132e-06	12.4216	4.06833e-06
12.4382	3.46766e-06	12.4386	4.0811e-06
12.4553	3.46923e-06	12.4556	4.08467e-06
12.4723	3.47922e-06	12.4727	4.05036e-06
12.4893	3.46269e-06	12.4897	4.02907e-06
12.5064	3.47101e-06	12.5068	4.03551e-06
12.5234	3.45817e-06	12.5238	4.00636e-06
12.5404	3.4684e-06	12.5408	4.00172e-06
12.5575	3.47048e-06	12.5579	4.01469e-06
12.5745	3.4569e-06	12.5749	4.00745e-06
12.5916	3.45897e-06	12.592	3.96066e-06
12.6086	3.44292e-06	12.609	3.96824e-06
12.6257	3.45128e-06	12.626	3.9536e-06
12.6427	3.47589e-06	12.6431	3.92007e-06
12.6597	3.45214e-06	12.6601	3.92608e-06
12.6768	3.45454e-06	12.6771	3.87736e-06
12.6938	3.47548e-06	12.6942	3.85304e-06
12.7108	3.45844e-06	12.7112	3.83302e-06
12.7279	3.47083e-06	12.7282	3.81782e-06
12.7449	3.47045e-06	12.7453	3.80213e-06
12.762	3.45643e-06	12.7623	3.77402e-06
12.779	3.45173e-06	12.7794	3.77738e-06
12.796	3.45463e-06	12.7964	3.75796e-06
12.8131	3.45601e-06	12.8134	3.68879e-06
12.8301	3.45982e-06	12.8305	3.70157e-06
12.8471	3.46017e-06	12.8475	3.658e-06
12.8642	3.44687e-06	12.8645	3.62879e-06
12.8812	3.45728e-06	12.8816	3.62193e-06
12.8983	3.45371e-06	12.8986	3.56132e-06
12.9153	3.44658e-06	12.9157	3.54277e-06
12.9323	3.45092e-06	12.9327	3.52524e-06
12.9494	3.44022e-06	12.9497	3.48149e-06
12.9664	3.45047e-06	12.9668	3.47481e-06
12.9834	3.45026e-06	12.9838	3.51301e-06
13.0005	3.44715e-06	13.0008	3.45387e-06
13.0175	3.449e-06	13.0179	3.43653e-06
13.0345	3.43602e-06	13.0349	3.45812e-06
13.0516	3.43953e-06	13.052	3.40943e-06
13.0686	3.42883e-06	13.069	3.40157e-06
13.0857	3.43314e-06	13.0861	3.3596e-06
13.1027	3.44137e-06	13.1031	3.40168e-06
13.1197	3.43049e-06	13.1201	3.3627e-06
13.1368	3.43344e-06	13.1372	3.33557e-06
13.1538	3.44561e-06	13.1542	3.34104e-06
13.1709	3.4334e-06	13.1712	3.28483e-06
13.1879	3.44389e-06	13.1883	3.27844e-06
13.2049	3.44946e-06	13.2053	3.24518e-06
13.222	3.43412e-06	13.2224	3.21161e-06
13.239	3.4319e-06	13.2394	3.20167e-06
13.2561	3.44739e-06	13.2564	3.15998e-06
13.2731	3.42096e-06	13.2735	3.16031e-06
13.2901	3.41651e-06	13.2905	3.14754e-06
13.3072	3.44016e-06	13.3075	3.14174e-06
13.3242	3.42265e-06	13.3246	3.11052e-06
13.3412	3.41437e-06	13.3416	3.09447e-06
13.3583	3.43666e-06	13.3587	3.08094e-06
13.3753	3.43324e-06	13.3757	3.0204e-06
13.3924	3.40693e-06	13.3927	3.02706e-06
13.4094	3.428e-06	13.4098	3.02482e-06
13.4264	3.42726e-06	13.4268	2.97572e-06
13.4435	3.39882e-06	13.4439	2.97206e-06
13.4605	3.41193e-06	13.4609	2.92642e-06
13.4776	3.42321e-06	13.4779	2.89183e-06
13.4946	3.40331e-06	13.495	2.84341e-06
13.5116	3.4142e-06	13.512	2.82176e-06
13.5287	3.40626e-06	13.5291	2.78504e-06
13.5457	3.41006e-06	13.5461	2.7466e-06
13.5627	3.4058e-06	13.5631	2.75032e-06
13.5798	3.41025e-06	13.5802	2.72005e-06
13.5968	3.40698e-06	13.5972	2.67756e-06
13.6138	3.41089e-06	13.6143	2.64922e-06
13.6309	3.41098e-06	13.6313	2.64784e-06
13.6479	3.41795e-06	13.6483	2.59202e-06
13.665	3.382e-06	13.6654	2.59711e-06
13.682	3.39392e-06	13.6824	2.55482e-06
13.699	3.41491e-06	13.6994	2.54086e-06
13.7161	3.40695e-06	13.7165	2.53271e-06
13.7331	3.37927e-06	13.7335	2.52222e-06
13.7502	3.38849e-06	13.7506	2.51447e-06
13.7672	3.3897e-06	13.7676	2.43763e-06
13.7843	3.38304e-06	13.7846	2.42937e-06
13.8013	3.38369e-06	13.8017	2.44659e-06
13.8183	3.37582e-06	13.8187	2.36365e-06
13.8354	3.37964e-06	13.8358	2.33536e-06
13.8524	3.36001e-06	13.8528	2.35342e-06
13.8695	3.3726e-06	13.8698	2.35661e-06
13.8865	3.38089e-06	13.8869	2.31597e-06
13.9035	3.36931e-06	13.9039	2.30124e-06
13.9206	3.368e-06	13.9209	2.26374e-06
13.9376	3.38343e-06	13.938	2.24061e-06
13.9546	3.37724e-06	13.955	2.23271e-06
13.9717	3.36125e-06	13.972	2.22789e-06
13.9887	3.38132e-06	13.9891	2.17264e-06
14.0058	3.3741e-06	14.0061	2.16937e-06
14.0228	3.36452e-06	14.0232	2.14997e-06
14.0398	3.37688e-06	14.0402	2.08526e-06
14.0569	3.36832e-06	14.0572	2.0384e-06
14.0739	3.36806e-06	14.0743	2.069e-06
14.0909	3.36069e-06	14.0913	2.0324e-06
14.108	3.36284e-06	14.1083	1.99392e-06
14.125	3.3652e-06	14.1254	1.95405e-06
14.1421	3.35742e-06	14.1424	1.94879e-06
14.1591	3.34682e-06	14.1595	1.95204e-06
14.1761	3.36569e-06	14.1765	1.94588e-06
14.1932	3.35499e-06	14.1936	1.8969e-06
14.2102	3.35875e-06	14.2106	1.90971e-06
14.2273	3.35228e-06	14.2276	1.85106e-06
14.2443	3.35426e-06	14.2447	1.86109e-06
14.2614	3.3471e-06	14.2617	1.83208e-06
14.2784	3.33761e-06	14.2787	1.78126e-06
14.2954	3.34798e-06	14.2958	1.77672e-06
14.3125	3.33984e-06	14.3128	1.77504e-06
14.3295	3.33174e-06	14.3299	1.72334e-06
14.3466	3.33743e-06	14.3469	1.71204e-06
14.3636	3.33229e-06	14.3639	1.69514e-06
14.3806	3.31919e-06	14.381	1.63021e-06
14.3977	3.33121e-06	14.398	1.61275e-06
14.4147	3.3397e-06	14.415	1.60034e-06
14.4317	3.31328e-06	14.4321	1.58955e-06
14.4488	3.32621e-06	14.4491	1.60831e-06
14.4658	3.33661e-06	14.4662	1.60085e-06
14.4828	3.33182e-06	14.4832	1.55166e-06
14.4999	3.33238e-06	14.5002	1.55626e-06
14.5169	3.33382e-06	14.5173	1.53451e-06
14.534	3.32587e-06	14.5343	1.49261e-06
14.551	3.3191e-06	14.5513	1.49034e-06
14.568	3.33455e-06	14.5684	1.46829e-06
14.5851	3.3309e-06	14.5854	1.41896e-06
14.6021	3.33917e-06	14.6024	1.36602e-06
14.6191	3.33975e-06	14.6195	1.38109e-06
14.6362	3.32e-06	14.6365	1.37042e-06
14.6532	3.3204e-06	14.6536	1.32612e-06
14.6703	3.33623e-06	14.6706	1.30496e-06
14.6873	3.32413e-06	14.6876	1.26912e-06
14.7043	3.32047e-06	14.7047	1.25276e-06
14.7214	3.33581e-06	14.7217	1.20618e-06
14.7384	3.33777e-06	14.7387	1.18391e-06
14.7554	3.3187e-06	14.7558	1.1603e-06
14.7725	3.33817e-06	14.7728	1.13202e-06
14.7895	3.32831e-06	14.7899	1.11001e-06
14.8066	3.32398e-06	14.8069	1.04028e-06
14.8236	3.32883e-06	14.8239	1.02808e-06
14.8407	3.32713e-06	14.841	1.02021e-06
14.8577	3.32356e-06	14.858	9.9316e-07
14.8747	3.32925e-06	14.875	9.789e-07
14.8918	3.32978e-06	14.8921	9.3753e-07
14.9088	3.3233e-06	14.9091	9.5548e-07
14.9258	3.31937e-06	14.9262	9.4166e-07
14.9429	3.31386e-06	14.9432	9.3325e-07
14.9599	3.32376e-06	14.9603	8.65994e-07
14.977	3.30891e-06	14.9773	8.5319e-07
14.994	3.316e-06	14.9944	8.32498e-07
15.011	3.32573e-06	15.0114	8.23398e-07
15.0281	3.31061e-06	15.0284	7.892e-07
15.0451	3.31069e-06	15.0455	7.68237e-07
15.0621	3.32415e-06	15.0625	7.61611e-07
15.0792	3.31597e-06	15.0795	7.35976e-07
15.0962	3.30683e-06	15.0966	7.04041e-07
15.1133	3.30514e-06	15.1136	6.81554e-07
15.1303	3.30582e-06	15.1307	6.70613e-07
15.1473	3.31208e-06	15.1477	6.71945e-07
15.1644	3.29516e-06	15.1647	6.29951e-07
15.1814	3.30526e-06	15.1818	6.3028e-07
15.1984	3.31399e-06	15.1988	6.09865e-07
15.2155	3.31897e-06	15.2158	6.0939e-07
15.2325	3.30489e-06	15.2329	5.86823e-07
15.2495	3.3136e-06	15.2499	5.73156e-07
15.2666	3.31488e-06	15.267	5.80401e-07
15.2836	3.31002e-06	15.284	5.63871e-07
15.3007	3.293e-06	15.301	5.45478e-07
15.3177	3.30233e-06	15.3181	5.28938e-07
15.3347	3.31483e-06	15.3351	5.13078e-07
15.3518	3.30903e-06	15.3521	4.96447e-07
15.3688	3.29482e-06	15.3692	4.98048e-07
15.3858	3.29829e-06	15.3862	4.88899e-07
15.4029	3.30324e-06	15.4033	4.83457e-07
15.4199	3.30527e-06	15.4203	4.63322e-07
15.437	3.28622e-06	15.4373	4.64045e-07
15.454	3.29172e-06	15.4544	4.5816e-07
15.471	3.30084e-06	15.4714	4.37625e-07
15.4881	3.28641e-06	15.4885	4.28976e-07
15.5051	3.29771e-06	15.5055	4.09844e-07
15.5222	3.31531e-06	15.5225	3.98043e-07
15.5392	3.2986e-06	15.5396	3.96013e-07
15.5562	3.29486e-06	15.5566	3.79964e-07
15.5733	3.29131e-06	15.5736	3.86811e-07
15.5903	3.29642e-06	15.5907	3.69228e-07
15.6074	3.2796e-06	15.6077	3.56131e-07
15.6244	3.29398e-06	15.6248	3.3686e-07
15.6414	3.28593e-06	15.6418	3.43539e-07
15.6585	3.27779e-06	15.6588	3.3856e-07
15.6755	3.28224e-06	15.6759	3.24791e-07
15.6926	3.28918e-06	15.6929	3.13119e-07
15.7096	3.28904e-06	15.71	3.08381e-07
15.7266	3.27235e-06	15.727	3.06907e-07
15.7437	3.2703e-06	15.744	2.95604e-07
15.7607	3.29017e-06	15.7611	2.85008e-07
15.7777	3.27197e-06	15.7781	2.89611e-07
15.7948	3.27888e-06	15.7952	2.8335e-07
15.8118	3.28242e-06	15.8122	2.71633e-07
15.8288	3.25667e-06	15.8292	2.61227e-07
15.8459	3.26627e-06	15.8463	2.58806e-07
15.8629	3.28135e-06	15.8633	2.48215e-07
15.88	3.26589e-06	15.8803	2.4019e-07
15.897	3.26478e-06	15.8974	2.38233e-07
15.914	3.27859e-06	15.9144	2.38895e-07
15.9311	3.27771e-06	15.9315	2.35849e-07
15.9481	3.27613e-06	15.9485	2.30737e-07
15.9651	3.2855e-06	15.9655	2.14513e-07
15.9822	3.28325e-06	15.9826	2.07127e-07
15.9992	3.26294e-06	15.9996	2.01286e-07
16.0163	3.27119e-06	16.0166	1.85627e-07
16.0333	3.26807e-06	16.0337	1.90866e-07
16.0503	3.25708e-06	16.0507	1.81578e-07
16.0674	3.26421e-06	16.0678	1.7092e-07
16.0844	3.32435e-06	16.0848	1.86177e-07
16.1014	3.56069e-06	16.1018	1.72888e-07
16.1185	3.71697e-06	16.1189	1.71749e-07
16.1355	3.86552e-06	16.1359	1.69706e-07
16.1526	3.98078e-06	16.153	1.62058e-07
16.1696	4.08273e-06	16.17	1.5502e-07
16.1867	4.18207e-06	16.187	1.55121e-07
16.2037	4.29119e-06	16.2041	1.43295e-07
16.2207	4.36944e-06	16.2211	1.37207e-07
16.2378	4.42822e-06	16.2382	1.28812e-07
16.2548	4.52203e-06	16.2552	1.29548e-07
16.2718	4.58843e-06	16.2722	1.2713e-07
16.2889	4.64543e-06	16.2893	1.17599e-07
16.3059	4.72847e-06	16.3063	1.15209e-07
16.3229	4.78904e-06	16.3233	1.21525e-07
16.34	4.8519e-06	16.3404	1.13132e-07
16.357	4.90914e-06	16.3574	1.02067e-07
16.3741	4.96692e-06	16.3744	9.9313e-08
16.3911	5.02425e-06	16.3915	9.0451e-08
16.4081	5.06787e-06	16.4085	9.3482e-08
16.4252	5.1242e-06	16.4256	8.8041e-08
16.4422	5.18597e-06	16.4428	8.37971e-08
16.4593	5.21017e-06	16.4598	8.25359e-08
16.4763	5.26277e-06	16.4769	7.43598e-08
16.4933	5.32513e-06	16.4939	7.08847e-08
16.5104	5.35185e-06	16.5109	7.12065e-08
16.5274	5.39889e-06	16.5279	6.39768e-08
16.5445	5.44176e-06	16.545	6.02124e-08
16.5615	5.4828e-06	16.562	5.69079e-08
16.5785	5.52343e-06	16.579	6.72111e-08
16.5955	5.57344e-06	16.596	5.48289e-08
16.6126	5.59443e-06	16.613	5.98181e-08
16.6296	5.63287e-06	16.6301	6.86684e-08
16.6467	5.68477e-06	16.6471	7.99465e-08
16.6637	5.68609e-06	16.6641	6.83804e-08
16.6807	5.74349e-06	16.6812	7.8888e-08
16.6978	5.78897e-06	16.6982	8.05077e-08
16.7148	5.79016e-06	16.7152	7.1333e-08
16.7318	5.8321e-06	16.7322	7.25591e-08
16.7488	5.87903e-06	16.7492	7.17613e-08
16.766	5.87101e-06	16.7662	5.82224e-08
16.783	5.91844e-06	16.7833	5.88841e-08
16.8	5.97636e-06	16.8003	6.09586e-08
16.817	5.97475e-06	16.8173	4.00265e-08
16.8342	6.00049e-06	16.8343	4.25572e-08
16.8512	6.06026e-06	16.8513	3.57791e-08
16.8682	6.06884e-06	16.8683	4.26069e-08
16.8852	6.0783e-06	16.8853	3.31166e-08
16.9022	6.13507e-06	16.9023	2.80812e-08
16.9193	6.15125e-06	16.9195	1.98742e-08
16.9363	6.17104e-06	16.9365	1.63553e-08
16.9533	6.20471e-06	16.9535	1.93354e-08
16.9703	6.22453e-06	16.9705	2.40488e-08
16.9875	6.25323e-06	16.9875	3.42184e-08
17.0045	6.25491e-06	17.0045	3.41903e-08
17.0215	6.28741e-06	17.0215	2.97821e-08
17.0385	6.32882e-06	17.0387	1.56984e-08
		17.0557	1.32797e-08
		17.0727	1.39776e-08
		17.0897	2.37709e-08
		17.1067	2.82327e-08
		17.1237	1.05853e-08
		17.1407	9.4985e-09
		17.1577	9.9194e-09
		17.1748	9.1556e-09
		17.1918	1.35598e-08
		17.2088	1.43698e-08
		17.2258	1.09164e-08
		17.2428	1.46009e-08
		17.2598	1.08718e-08
		17.2768	2.3001e-08
		17.294	1.04512e-08
		17.311	9.8959e-09
		17.328	7.8653e-09
		17.345	4.2578e-09
		17.362	6.8123e-09
		17.379	7.5325e-09
		17.396	1.45354e-08
		17.4132	3.7667e-09
		17.4302	3.6541e-09
		17.4472	3.102e-09
		17.4642	2.2186e-09
		17.4812	6.359e-10
		17.4982	1.7428e-09
		17.5152	1.4367e-09
		17.5323	5.58e-11
		17.5493	6.908e-10
		17.5663	1.0083e-09
		17.5833	6.966e-10
		17.6003	1.445e-10
		17.6173	5.112e-10
		17.6343	1.028e-09
		17.6515	6.172e-10
		17.6685	4.435e-10
		17.6855	1.2733e-09
		17.7025	5.516e-10
		17.7195	-1.913e-10
		17.7365	5.057e-10
		17.7535	6.668e-10
		17.7705	1.465e-10
		17.7877	4.356e-10
		17.8047	7.943e-10
		17.8217	2.965e-10
		17.8387	-1.878e-10
		17.8557	5.011e-10
		17.8727	6.997e-10
		17.8897	1.219e-10
		17.9068	2.602e-10
		17.9238	7.388e-10
		17.9408	2.979e-10
		17.9578	-3.603e-10
		17.9748	2.931e-10
		17.9918	8.292e-10
		18.0088	7.04e-11
		18.0258	-2.82e-10
		18.043	3.653e-10
		18.06	5.571e-10
		18.077	-1.322e-10
		18.094	-1.17e-11
		18.111	5.312e-10
		18.128	3.259e-10
		18.145	-1.338e-10
		18.162	1.35e-10
		18.1792	1.0895e-09
		18.1962	3.119e-10
		18.2132	-2.632e-10
		18.2302	1.293e-10
		18.2472	1.054e-09
		18.2642	6.618e-10
		18.2812	-2.231e-10
		18.2982	5.581e-10
		18.3153	9.582e-10
		18.3323	1.322e-10
		18.3493	-1.165e-10
		18.3663	3.929e-10
		18.3833	4.526e-10
		18.4003	-2.023e-10
		18.4173	1.3e-11
		18.4345	6.539e-10
		18.4515	1.727e-10
		18.4685	-4.296e-10
		18.4855	1.99e-10
		18.5025	6.867e-10
		18.5195	4.56e-11
		18.5365	-4.229e-10
		18.5535	2.98e-10
		18.5707	4.546e-10
		18.5877	-2.439e-10
		18.6047	1.77e-11
		18.6217	6.4e-10
		18.6387	6.68e-11
		18.6557	-5.219e-10
		18.6727	2.273e-10
		18.6898	5.432e-10
		18.7068	-2.079e-10
		18.7238	-7.66e-11
		18.7408	6.077e-10
		18.7578	6.14e-11
		18.7748	-5.602e-10
		18.7918	2.053e-10
		18.8088	4.756e-10
		18.826	-2.61e-10
		18.843	9.7e-12
		18.86	6.598e-10
		18.877	-5.9e-12
		18.894	-4.973e-10
		18.911	2.539e-10
		18.928	3.866e-10
		18.945	-2.905e-10
		18.9622	6.41e-11
		18.9792	7.357e-10
		18.9962	1.41e-11
		19.0132	-4.241e-10
		19.0302	2.997e-10
		19.0472	3.987e-10
		19.0642	-3.247e-10
		19.0813	8.94e-11
		19.0983	7.364e-10
		19.1153	2.15e-11
		19.1323	-4.32e-10
		19.1493	3.91e-10
		19.1663	4.824e-10
		19.1833	-2.238e-10
		19.2003	-1.57e-11
		19.2175	6.356e-10
		19.2345	1.186e-10
		19.2515	-5.1e-10
		19.2685	1.844e-10
		19.2855	6.489e-10
		19.3025	-8.13e-11
		19.3195	-1.764e-10
		19.3365	4.708e-10
		19.3537	1.898e-10
		19.3707	-4.318e-10
		19.3877	7.82e-11
		19.4047	6.732e-10
		19.4217	4.71e-11
		19.4387	-5.067e-10
		19.4557	1.929e-10
		19.4728	6.734e-10
		19.4898	2.11e-11
		19.5068	-4.188e-10
		19.5238	2.445e-10
		19.5408	4.26e-10
		19.5578	-1.09e-10
		19.5748	-1.45e-11
		19.5918	6.467e-10
		19.609	9.75e-11
		19.626	-4.917e-10
		19.643	2.05e-10
		19.66	8.216e-10
		19.677	-2.55e-11
		19.694	-3.816e-10
		19.711	3.055e-10
		19.7282	6.34e-10
		19.7452	-4.28e-11
		19.7622	-1.479e-10
		19.7792	3.858e-10
		19.7962	4.809e-10
		19.8132	-9.71e-11
		19.8302	-1.327e-10
		19.8472	3.883e-10
		19.8643	5.947e-10
		19.8813	3.1e-12
		19.8983	-3.664e-10
		19.9153	2.796e-10
		19.9323	7.103e-10
		19.9493	1.41e-11
		19.9663	-2.75e-10
		19.9833	3.897e-10
		20.0005	5.789e-10
		20.0175	-5.79e-11
		20.0345	-1.558e-10
		20.0515	5.088e-10
		20.0685	4.33e-10
		20.0855	-2.485e-10
		20.1025	4.2e-11
		20.1197	6.988e-10
		20.1367	2.179e-10
		20.1537	-4.536e-10
		20.1707	2.124e-10
		20.1877	7.149e-10
		20.2047	2.18e-11
		20.2217	-2.039e-10
		20.2387	4.675e-10
		20.2558	4.032e-10
		20.2728	-3.418e-10
		20.2898	1.587e-10
		20.3068	7.895e-10
		20.3238	8.24e-11
		20.3408	-4.063e-10
		20.3578	2.838e-10
		20.375	6.258e-10
		20.392	-9.7e-11
		20.409	-1.06e-11
		20.426	6.446e-10
		20.443	2.629e-10
		20.46	-3.676e-10
		20.477	2.364e-10
		20.4942	9.269e-10
		20.5112	2.267e-10
		20.5282	-3.766e-10
		20.5452	3.674e-10
		20.5622	7.254e-10
		20.5792	2.07e-11
		20.5962	-1.221e-10
		20.6132	5.513e-10
		20.6303	2.969e-10
		20.6473	-3.35e-10
		20.6643	2.284e-10
		20.6813	8.104e-10
		20.6983	9.3e-11
		20.7153	-4.217e-10
		20.7323	3.131e-10
		20.7493	7.461e-10
		20.7665	8.35e-11
		20.7835	-3.192e-10
		20.8005	3.838e-10
		20.8175	6.97e-10
		20.8345	7.84e-11
		20.8515	-2.653e-10
		20.8685	3.679e-10
		20.8857	6.969e-10
		20.9027	2.38e-11
		20.9197	-1.684e-10
		20.9367	4.97e-10
		20.9537	4.903e-10
		20.9707	-1.393e-10
		20.9877	6.081e-10
		21.0047	1.3543e-09
		21.0218	3.518e-10
		21.0388	-2.628e-10
		21.0558	1.756e-10
		21.0728	6.845e-10
		21.0898	1.975e-10
		21.1068	-2.807e-10
		21.1238	2.345e-10
		21.1408	8.683e-10
		21.158	1.736e-10
		21.175	-3.625e-10
		21.192	3.338e-10
		21.209	8.036e-10
		21.226	2.717e-10
		21.243	-3.774e-10
		21.26	2.828e-10
		21.2772	7.454e-10
		21.2942	1.391e-10
		21.3112	-4.171e-10
		21.3282	2.603e-10
		21.3452	6.908e-10
		21.3622	2.688e-10
		21.3792	-2.323e-10
		21.3962	1.611e-10
		21.4133	6.982e-10
		21.4303	3.661e-10
		21.4473	-1.636e-10
		21.4643	1.659e-10
		21.4813	7.249e-10
		21.4983	3.422e-10
		21.5153	-2.587e-10
		21.5325	1.701e-10
		21.5495	7.838e-10
		21.5665	2.626e-10
		21.5835	-3.455e-10
		21.6005	2.096e-10
		21.6175	7.824e-10
		21.6345	2.924e-10
		21.6515	-2.434e-10
		21.6687	2.228e-10
		21.6857	7.972e-10
		21.7027	4.323e-10
		21.7197	-1.569e-10
		21.7367	5.88e-11
		21.7537	5.637e-10
		21.7707	5.509e-10
		21.7877	2.77e-11
		21.8048	-1.293e-10
		21.8218	4.001e-10
		21.8388	8.261e-10
		21.8558	1.805e-10
		21.8728	-3.117e-10
		21.8898	3.613e-10
		21.9068	8.523e-10
		21.924	2.853e-10
		21.941	-1.838e-10
		21.958	1.11e-10
		21.975	5.075e-10
		21.992	7.154e-10
		22.009	1.442e-10
		22.026	-3.979e-10
		22.043	2.454e-10
		22.0602	8.32e-10
		22.0772	4.161e-10
		22.0942	-2.89e-11
		22.1112	-2.06e-11
		22.1282	4.509e-10
		22.1452	8.776e-10

## Sheet: Fig. 7c
Gate voltage (V)	Drain current (before) (A)	Drain current (after) (A)
-60	5.75505e-07	4.46411e-08
-59	5.86976e-07	4.31958e-08
-58	5.88648e-07	4.18523e-08
-57	5.83764e-07	4.09189e-08
-56	5.78807e-07	4.00089e-08
-55	5.75787e-07	3.82253e-08
-54	5.62782e-07	3.70304e-08
-53	5.66319e-07	3.61033e-08
-52	5.57943e-07	3.47421e-08
-51	5.68717e-07	3.36433e-08
-50	5.47168e-07	3.28001e-08
-49	5.53682e-07	3.13037e-08
-48	5.55803e-07	2.96719e-08
-47	5.59204e-07	2.87166e-08
-46	5.55339e-07	2.74477e-08
-45	5.54427e-07	2.59289e-08
-44	5.54093e-07	2.52259e-08
-43	5.44494e-07	2.44789e-08
-42	5.25812e-07	2.28551e-08
-41	5.29102e-07	2.19487e-08
-40	5.28123e-07	2.1308e-08
-39	5.29221e-07	2.00528e-08
-38	5.17597e-07	1.88663e-08
-37	5.25455e-07	1.82738e-08
-36	5.27178e-07	1.7595e-08
-35	5.17375e-07	1.62595e-08
-34	5.12665e-07	1.55883e-08
-33	5.03302e-07	1.53206e-08
-32	5.04669e-07	1.45068e-08
-31	5.04018e-07	1.39592e-08
-30	4.99058e-07	1.40413e-08
-29	5.0155e-07	1.33647e-08
-28	4.95182e-07	1.23885e-08
-27	4.93329e-07	1.22692e-08
-26	4.78543e-07	1.20364e-08
-25	4.79844e-07	1.09028e-08
-24	4.80873e-07	1.0533e-08
-23	4.75307e-07	1.04642e-08
-21.9999	4.63278e-07	9.3653e-09
-21	4.57832e-07	8.8623e-09
-19.9999	4.53871e-07	8.6354e-09
-18.9999	4.53301e-07	7.9082e-09
-18	4.3647e-07	7.0837e-09
-16.9999	4.3726e-07	7.0196e-09
-16	4.35496e-07	6.696e-09
-15	4.21832e-07	6.0025e-09
-14	4.17688e-07	5.9763e-09
-13	4.11761e-07	5.9024e-09
-12	4.07173e-07	5.0684e-09
-10.9999	3.9262e-07	4.6972e-09
-9.99997	3.85726e-07	4.8553e-09
-8.99994	3.71822e-07	4.2618e-09
-7.99995	3.60795e-07	3.5398e-09
-6.99996	3.47125e-07	3.6825e-09
-5.99996	3.34685e-07	3.4089e-09
-4.99996	3.2674e-07	2.6541e-09
-3.99996	3.04872e-07	2.7297e-09
-2.99997	2.91972e-07	2.8135e-09
-1.99998	2.78667e-07	2.1588e-09
-0.999961	2.64766e-07	2.0396e-09
3.47e-05	2.48846e-07	2.3308e-09
1.00003	2.36597e-07	1.6524e-09
2.00005	2.29618e-07	1.3943e-09
3.00005	2.22748e-07	1.7664e-09
4.00003	2.15891e-07	1.4167e-09
5.00005	2.14056e-07	1.0274e-09
6.00004	2.15729e-07	1.3841e-09
7.00002	2.19038e-07	1.3957e-09
8.00003	2.19799e-07	9.455e-10
9.00005	2.26936e-07	1.3311e-09
10	2.37825e-07	1.5439e-09
11	2.50217e-07	1.1082e-09
12	2.56309e-07	1.2193e-09
13	2.67145e-07	1.607e-09
14	2.80834e-07	1.2859e-09
15	2.90318e-07	1.0637e-09
16	2.98923e-07	1.5826e-09
17	3.13227e-07	1.5474e-09
18.0001	3.24559e-07	1.202e-09
19.0001	3.30808e-07	1.6292e-09
20	3.41082e-07	1.9266e-09
21.0001	3.53296e-07	1.5821e-09
22	3.63096e-07	1.6381e-09
23	3.66722e-07	2.1059e-09
24	3.77059e-07	1.818e-09
25	3.91162e-07	1.5351e-09
26	3.98897e-07	2.0469e-09
27	4.02921e-07	2.1291e-09
28	4.11298e-07	1.7247e-09
29	4.13785e-07	2.1147e-09
30	4.25908e-07	2.2828e-09
31	4.35491e-07	1.9105e-09
32	4.41204e-07	2.2398e-09
33	4.42366e-07	2.5394e-09
34	4.55485e-07	2.225e-09
35	4.59772e-07	2.1354e-09
36	4.57261e-07	2.6406e-09
37	4.66428e-07	2.5148e-09
38	4.85701e-07	2.1887e-09
39	4.94781e-07	2.6623e-09
40	4.97688e-07	2.888e-09
41	4.79036e-07	2.5357e-09
42	4.94531e-07	2.702e-09
43	4.96156e-07	3.1314e-09
44	5.07376e-07	2.7974e-09
45	5.07385e-07	2.6073e-09
46	5.02726e-07	3.0794e-09
47	5.11467e-07	3.0494e-09
48	5.03666e-07	2.7168e-09
49	5.03891e-07	3.1721e-09
50	5.18042e-07	3.5749e-09
51	5.07407e-07	3.0899e-09
52	5.14269e-07	3.2126e-09
53	5.28978e-07	3.6641e-09
54	5.24483e-07	3.3473e-09
55	5.25337e-07	3.203e-09
56	5.38273e-07	3.6578e-09
57	5.37148e-07	3.5784e-09
58	5.37393e-07	3.1971e-09
59	5.29429e-07	3.6192e-09
60	5.34941e-07	3.8222e-09

## Sheet: Fig. S1
Wavelength (nm)	Relative radiation irradiance (%)
200.4	1.70132
200.8	1.70132
202.4	3.02458
202.8	3.02458
203.6	3.11909
204	2.93006
204.4	3.59168
206	1.32325
206.8	2.26843
209.6	1.51229
210	1.32325
210.8	1.79584
211.2	1.79584
211.6	1.60681
214.4	1.89036
214.8	1.98488
215.2	1.89036
217.6	1.32325
222.8	1.32325
228.4	1.22873
228.8	1.22873
233.2	1.79584
235.2	1.22873
235.6	1.32325
236	1.32325
238.4	1.89036
238.8	1.60681
239.2	1.41777
239.6	1.22873
242	1.79584
242.4	1.60681
242.8	1.60681
243.2	1.32325
246	1.70132
246.4	1.60681
247.2	2.93006
248.8	2.45747
249.2	1.89036
249.6	1.89036
250	1.98488
252.8	1.22873
253.2	1.13422
253.6	1.13422
255.2	2.17391
256	1.79584
256.4	1.0397
256.8	1.0397
257.2	1.0397
258.8	1.41777
260	1.41777
260.4	1.51229
260.8	1.51229
263.2	1.13422
263.6	1.22873
264	1.22873
264.4	1.79584
266.8	1.60681
267.2	1.51229
267.6	1.41777
269.2	1.70132
270.4	1.0397
270.8	1.0397
271.2	1.0397
274	1.0397
274.4	1.0397
274.8	1.13422
277.2	1.22873
277.6	1.13422
278	1.13422
280.8	1.51229
281.2	1.51229
281.6	1.51229
284.4	1.0397
284.8	1.0397
285.2	1.0397
288	1.13422
288.4	1.41777
288.8	1.89036
291.6	1.32325
292	1.22873
294.4	2.36295
294.8	2.74102
295.2	3.6862
295.6	4.06427
298.4	3.87524
298.8	3.6862
299.2	3.6862
299.6	1.70132
300	2.36295
300.8	5.19849
302	6.52174
302.4	6.61626
302.8	6.42722
303.6	4.44234
304.4	3.78072
305.6	2.83554
306	2.74102
306.4	2.55199
308.8	2.45747
309.2	2.93006
309.6	3.21361
310	4.44234
310.8	9.64083
311.2	12.0983
312.4	18.9036
312.8	19.3762
313.2	19.2817
314	15.0284
314.8	9.26276
315.6	6.71077
316	5.86011
316.4	4.7259
316.8	4.15879
319.6	2.17391
320	2.17391
320.4	2.07939
323.2	1.70132
323.6	1.79584
326.4	1.70132
326.8	1.70132
327.2	1.79584
330	1.79584
330.4	1.98488
330.8	1.98488
331.6	2.6465
332.4	6.52174
332.8	8.79017
333.2	9.64083
333.6	9.64083
334	10.2079
334.4	9.92439
336	9.92439
336.8	6.80529
337.2	3.78072
337.6	3.59168
338	3.6862
339.2	5.7656
339.6	5.48204
340.4	3.11909
340.8	2.83554
341.2	2.74102
342.8	3.6862
344	2.55199
344.4	2.36295
344.8	2.26843
347.6	2.55199
348	2.55199
348.4	2.55199
350	1.60681
350.4	1.32325
350.8	1.32325
351.2	2.6465
351.6	2.6465
352	2.6465
352.8	3.96975
353.6	4.91493
354.4	4.44234
354.8	4.44234
358	4.82042
358.4	5.38752
358.8	6.04915
360	9.64083
360.4	11.0586
360.8	13.8941
361.2	16.2571
361.6	22.6843
362	27.4102
362.4	37.7127
362.8	51.2287
363.2	64.9338
364	100
364.4	98.1096
364.8	99.1493
365.2	94.4234
365.6	93.1947
366	91.5879
366.8	63.327
367.2	46.7864
367.6	45.3686
368.4	29.8677
368.8	28.7335
369.2	25.6144
369.6	18.62
370	16.6352
371.2	11.9093
372	10.4915
372.4	9.92439
372.8	10.397
374.8	8.97921
375.2	8.79017
375.6	6.42722
376	6.14367
376.4	6.04915
378.8	7.65595
379.2	5.86011
379.6	5.48204
380	5.19849
381.6	5.95463
382	5.95463
382.4	5.57656
382.8	4.15879
383.2	4.06427
383.6	3.96975
385.2	4.82042
386	3.59168
386.4	3.40265
386.8	3.40265
389.6	3.30813
390	3.30813
390.4	3.30813
393.2	3.02458
393.6	3.02458
394	3.02458
396.8	3.21361
397.2	3.30813
397.6	3.30813
400	3.6862
400.4	3.49716
400.8	4.06427
401.2	5.95463
402	10.8696
402.4	21.7391
402.8	26.6541
403.6	29.8677
404	30.3403
404.4	30.3403
404.8	22.8733
405.2	22.4008
406.4	12.1928
406.8	12.0983
407.2	10.4915
407.6	9.16824
408	8.03403
410.4	4.82042
410.8	3.87524
411.2	3.6862
411.6	3.49716
414.4	2.6465
414.8	2.6465
415.2	2.6465
417.6	2.55199
418	2.55199
421.2	2.36295
421.6	2.36295
422	2.26843
424.8	2.55199
425.2	2.55199
425.6	2.55199
428.4	3.02458
428.8	3.11909
429.2	3.30813
430.8	4.63138
431.6	6.04915
432	7.56144
432.4	9.26276
432.8	15.7845
433.2	22.9679
433.6	31.9471
434	38.7524
434.4	42.344
434.8	42.344
435.2	42.2495
435.6	42.2495
436	42.4386
436.4	28.7335
437.2	17.7694
437.6	14.8393
438	13.8941
438.4	9.92439
438.8	9.82987
439.2	8.50662
439.6	8.79017
440.4	4.91493
442	5.48204
442.4	3.6862
442.8	3.49716
443.2	3.30813
444.4	2.55199
444.8	3.6862
446	2.26843
446.4	2.07939
449.2	1.79584
449.6	1.79584
450	1.79584
450.8	1.70132
451.2	1.32325
452.8	1.41777
453.2	1.41777
453.6	1.32325
456.4	1.0397
456.8	1.0397
457.2	1.0397
460	0.661626
460.4	0.661626
460.8	0.756144
463.2	0.661626
463.6	0.661626
464	0.661626
466.8	0.567108
467.2	0.567108
467.6	0.567108
470.4	0.378072
470.8	0.378072
471.2	0.378072
474	0.378072
474.4	0.378072
474.8	0.378072
477.2	0.378072
477.6	0.378072
478	0.378072
480.8	0.378072
481.2	0.378072
481.6	0.378072
484.4	0.378072
484.8	0.378072
485.2	0.378072
488	0.378072
488.4	0.378072
488.8	0.378072
491.6	0.378072
492	0.378072
494.8	0.378072
495.2	0.378072
495.6	0.378072
498.4	0.378072
498.8	0.378072
499.2	0.378072
502.8	0.378072
504	0.283554
505.6	0.283554
506	0.283554
506.4	0.283554
508	0.283554
508.4	0.283554
508.8	0.283554
509.2	0.283554
509.6	0.283554
512.4	0.283554
512.8	0.283554
513.2	0.283554
516	0.283554
516.4	0.283554
516.8	0.283554
519.6	0.283554
520	0.283554
520.4	0.283554
522	0.283554
523.2	0.283554
523.6	0.283554
526.4	0.283554
526.8	0.283554
527.2	0.283554
530	0.283554
530.4	0.283554
530.8	0.283554
533.6	0.283554
534	0.283554
534.4	0.283554
534.8	0.189036
535.2	0.189036
535.6	0.189036
537.2	0.283554
537.6	0.283554
538	0.283554
538.4	0.189036
538.8	0.189036
540.4	0.47259
540.8	0.567108
541.2	0.756144
541.6	1.41777
542.4	2.74102
542.8	3.59168
543.2	3.87524
543.6	4.25331
544	4.06427
544.4	3.96975
544.8	3.78072
545.2	3.21361
547.6	1.89036
548	1.70132
548.4	1.51229
551.6	0.661626
554.4	0.283554
554.8	0.283554
555.2	0.283554
558	0.283554
558.4	0.283554
558.8	0.283554
561.6	0.283554
562	0.283554
562.4	0.283554
565.2	0.283554
565.6	0.283554
566	0.283554
566.8	0.283554
567.2	0.283554
568.8	0.283554
569.2	0.283554
570.8	0.661626
572	0.94518
572.8	1.51229
575.6	2.36295
576	2.36295
576.4	2.36295
579.2	1.41777
579.6	1.22873
580	1.22873
582.8	0.756144
583.2	0.661626
583.6	0.661626
586	0.567108
586.4	0.567108
586.8	0.567108
589.6	0.47259
590	0.47259
590.4	0.47259
590.8	0.378072
591.6	0.378072
593.2	0.47259
593.6	0.47259
594	0.47259
594.4	0.378072
594.8	0.378072
596.8	0.47259
597.2	0.47259
597.6	0.47259
598	0.378072
598.4	0.378072
599.2	0.378072
